# Supplementary material for: Characteristics of total gaseous mercury (TGM) concentrations in an industrial complex in southern Korea: Impacts from local sources
Source: Copernicus journal article supplement (doi:10.5194/acp-2015-939), 2016-01-18
Supplement: Supplementary file 1 [file acp-2015-939-supplement.pdf]

1 Supporting Information for

2

3

4 **Characteristics of total gaseous mercury (TGM) concentrations in an**  
5 **industrial complex in southern Korea: Impacts from local sources**

6

7 Yong-Seok Seo<sup>1,2</sup>, Seung-Pyo Jeong<sup>1</sup>, Thomas M. Holsen<sup>3</sup>, Young-Ji Han<sup>4</sup>, Eunhwa Choi<sup>5</sup>, Eun  
8 Ha Park<sup>1</sup>, Tae Young Kim<sup>1</sup>, Hee-Sang Eum<sup>1</sup>, Dae Gun Park<sup>1</sup>, Eunhye Kim<sup>6</sup>, Soontae Kim<sup>6</sup>,  
9 Jeong-Hun Kim<sup>7</sup>, Jaewon Choi<sup>8</sup>, Seung-Muk Yi<sup>1,2,\*</sup>

10

11 <sup>1</sup>Department of Environmental Health, Graduate School of Public Health, Seoul National  
12 University, 1 Gwanak, Gwanak-ro, Gwanak-gu, Seoul 151-742, South Korea

13

14 <sup>2</sup>Institute of Health and Environment, Seoul National University, 1 Gwanak, Gwanak-ro,  
15 Gwanak-gu, Seoul 151-742, South Korea

16

17 <sup>3</sup>Department of Civil and Environmental Engineering, Clarkson University, Potsdam,  
18 NY13699, USA

19

20 <sup>4</sup>Department of Environmental Science, Kangwon National University, 192-1, Hyoja-2-dong,  
21 Chuncheon, Kangwondo, 200-701, South Korea

22

23 <sup>5</sup>Asian Institute for Energy, Environment & Sustainability, Seoul National University, 1  
24 Gwanak-ro, Gwanak-gu, Seoul 151-742, South Korea

25

26 <sup>6</sup>Department of Environmental, Civil and Transportation Engineering, Ajou University,  
27 Woncheon-dong, Yeongtong-gu, Suwon, 443-749, South Korea

28

29 <sup>7</sup>Division of Air Pollution Engineering, Department of Climate and Air Quality Research,  
30 National Institute of Environmental Research, Hwangyong-ro 42, Seogu, Incheon, 404-708,  
31 South Korea

32

33 <sup>8</sup>University of Pennsylvania, Philadelphia, PA19104, USA

34

35

36

37

38

39

40

41

42

43 \*Address correspondence to Dr. Seung-Muk Yi, Graduate School of Public Health, Seoul  
44 National University, 1 Gwanak, Gwanak-ro, Gwanak-gu, Seoul 151-742, South Korea

45 E-mail) yiseung@snu.ac.kr

46 Telephone) 82-2-880-2736

47 Fax) 82-2-745-9104

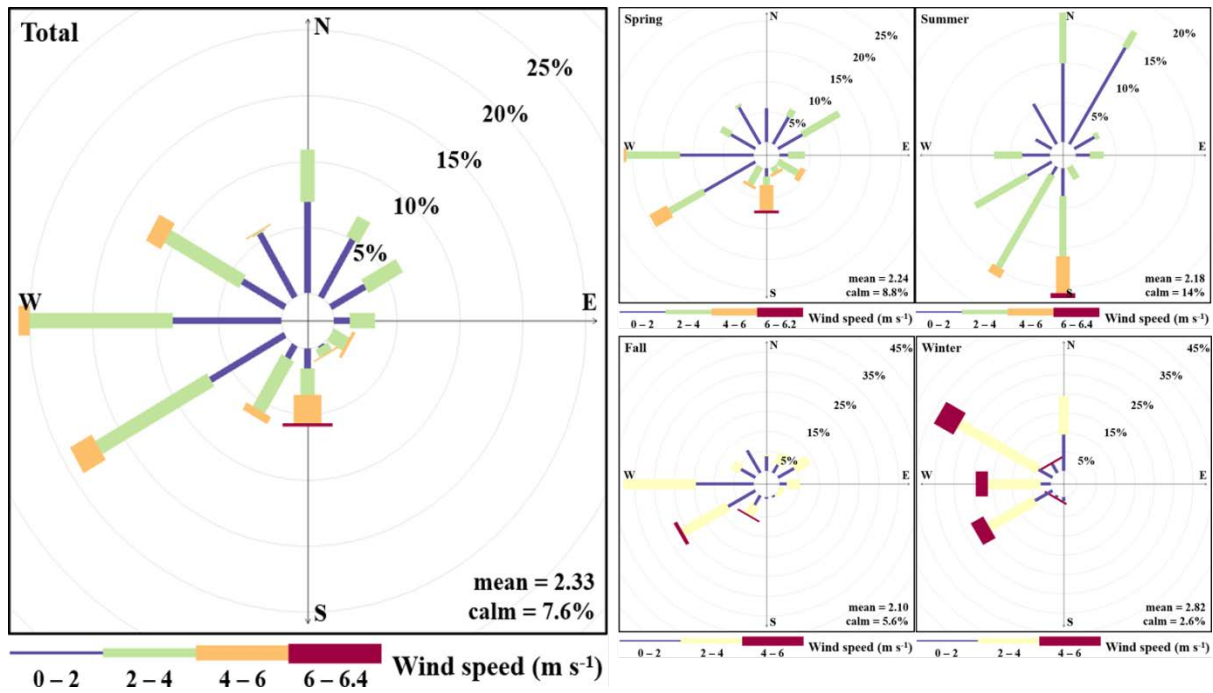

48

49 **Fig. S1. Frequency of counts of measured wind direction occurrence by season in this**  
 50 **study.**

51

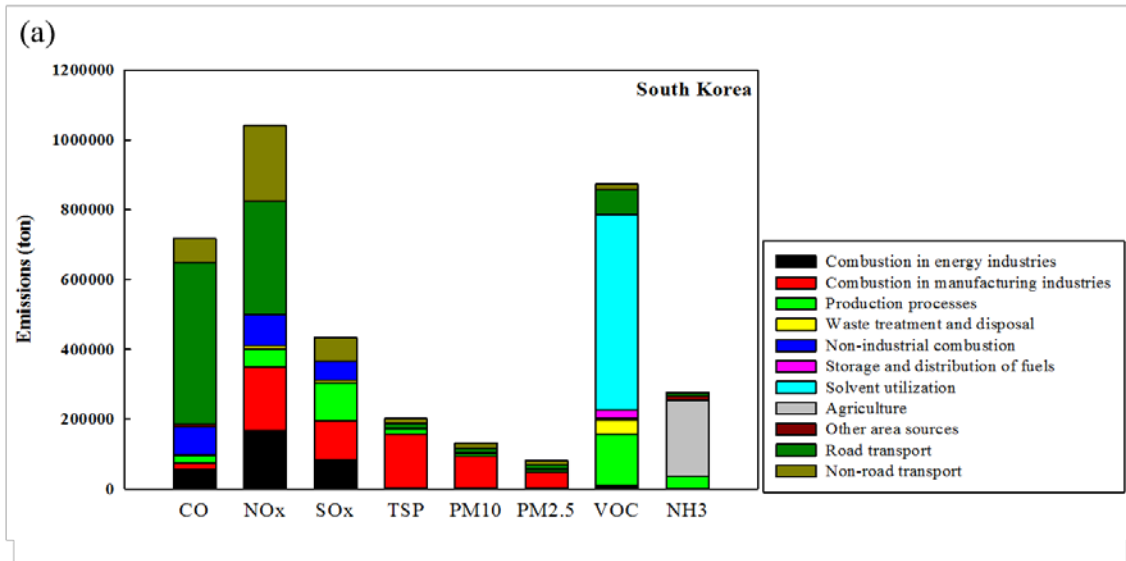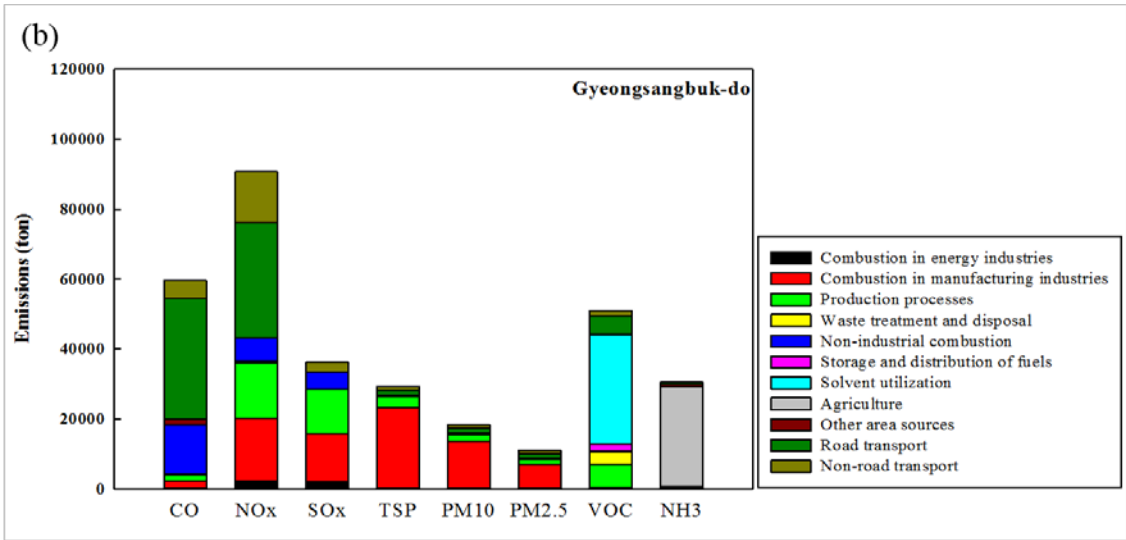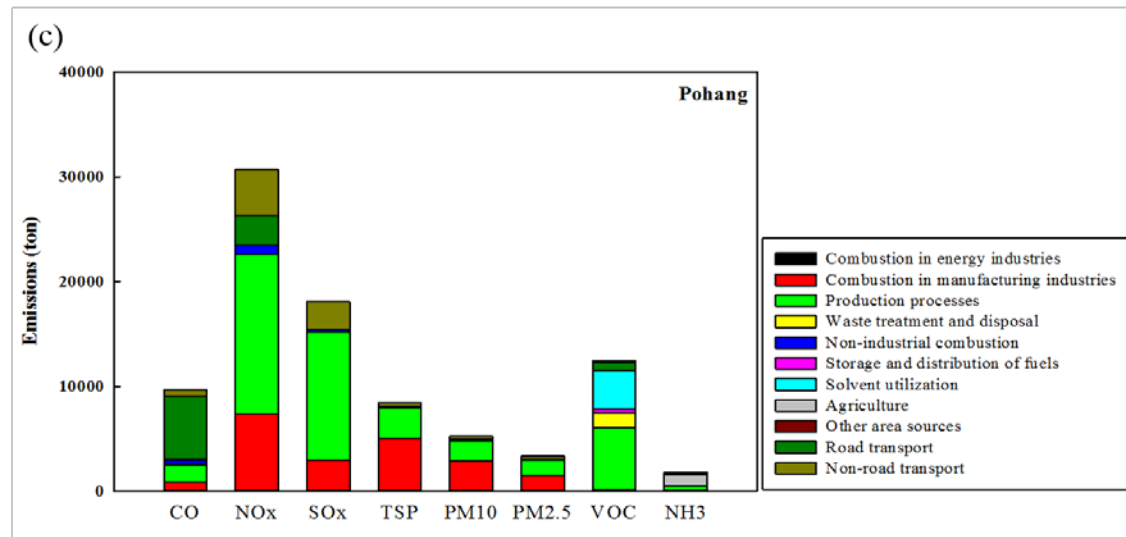

52

53 Fig. S2. Sectoral contribution of emissions of (a) South Korea, (b) Gyeongsangbuk-do  
 54 and (c) Pohang for CO, NOx, SOx, TSP VOC and NH<sub>3</sub>.

55

56 **Sectoral contribution of emissions**

57 In South Korea, the NO<sub>x</sub> emissions were highest, followed by VOC, CO, SO<sub>x</sub>, NH<sub>3</sub>, TSP,  
58 PM<sub>10</sub> and PM<sub>2.5</sub> (Fig. S2(a)). In Gyeongsangbuk-do, the NO<sub>x</sub> emissions were highest,  
59 followed by CO, VOC, SO<sub>x</sub>, NH<sub>3</sub>, and TSP, PM<sub>10</sub> and PM<sub>2.5</sub> which is similar trend to South  
60 Korea (Fig. S2(b)). However, Pohang showed a different pattern with the highest NO<sub>x</sub>  
61 emissions, followed by SO<sub>x</sub>, VOC, CO, TSP, PM<sub>10</sub>, PM<sub>2.5</sub> and NH<sub>3</sub> (Fig. S2(c)).

62 Point source (combustion in energy industries + combustion in manufacturing industries +  
63 production processes + waste treatment and disposal) in South Korea accounted for  
64 1,226,609 tons (34.6% of total emissions in South Korea) of the air pollutants.  
65 Gyeongsangbuk-do has a similar trend with 106,439 tons (35.8% of total emissions in  
66 Gyeongsangbuk-do) of the air pollutants. However, Pohang has a significantly high  
67 contribution with 56,144 tons (69.2% of total emissions in Pohang) of the air pollutants.

68 Area source (non-industrial combustion + storage and distribution of fuels + solvent  
69 utilization + agriculture + other area sources) in South Korea accounted for 1,055,461 tons  
70 (29.8% of total emissions in South Korea) of the air pollutants. Gyeongsangbuk-do has a  
71 similar trend with 90,982 tons (30.6% of total emissions in Gyeongsangbuk-do) of the air  
72 pollutants. However, Pohang has a less contribution with 6,903 tons (8.5% of total emissions  
73 in Pohang) of the air pollutants.

74 Mobile source (road transport + non-road transport) in South Korea accounted for  
75 1,261,782 tons (35.6% of total emissions in South Korea) of the air pollutants.  
76 Gyeongsangbuk-do has a similar contribution with 99,709 tons (33.6% of total emissions in  
77 Gyeongsangbuk-do) of the air pollutants. Pohang also has a lower contribution with 18,048  
78 tons (22.3% of total emissions in Pohang) of the air pollutants.

79

80 **Table S1. Source Classification Categories (SCC) in CAPSS. The fugitive dust and**  
 81 **biomass were excluded.**

| <b>Emission characteristics</b> | <b>SCC1 (11)</b>                              | <b>SCC2 (42)</b>                                                                                                                                                                                                                                                                                                                        | <b>SCC3 (173)</b> |
|---------------------------------|-----------------------------------------------|-----------------------------------------------------------------------------------------------------------------------------------------------------------------------------------------------------------------------------------------------------------------------------------------------------------------------------------------|-------------------|
| <b>Point source</b>             | <b>Combustion in energy industries</b>        | - Public power<br>- District heating plants<br>- Petroleum refining plants<br>- Commercial power                                                                                                                                                                                                                                        | 4                 |
|                                 | <b>Combustion in manufacturing industries</b> | - Process furnace<br>- Combustion plants<br>- Other                                                                                                                                                                                                                                                                                     | 44                |
|                                 | <b>Production processes</b>                   | - Processes in other industries<br>- Processes in wood, paper and pulp industries<br>- Processes in inorganic chemical industries<br>- Processes in petroleum industries<br>- Processes in food and drink industries<br>- Ammonia consumption<br>- Processes in organic chemical industries<br>- Processes in iron and steel industries | 44                |
|                                 | <b>Waste treatment and disposal</b>           | - Waste incineration<br>- Other waste treatment                                                                                                                                                                                                                                                                                         | 5                 |
| <b>Area source</b>              | <b>Non-industrial combustion</b>              | - Commercial and institutional plants<br>- Plants in agriculture, forestry and aquaculture<br>- Residential plants                                                                                                                                                                                                                      | 5                 |
|                                 | <b>Storage and distribution of fuels</b>      | - Gasoline distribution                                                                                                                                                                                                                                                                                                                 | 3                 |
|                                 | <b>Solvent utilization</b>                    | - Paint application<br>- Electronic Degreaser<br>- Dry cleaning<br>- Other use of solvents and related activities                                                                                                                                                                                                                       | 15                |
|                                 | <b>Agriculture</b>                            | - Enteric fermentation<br>- Cultures with fertilizers                                                                                                                                                                                                                                                                                   | 10                |
|                                 | <b>Other area sources</b>                     | - Forest and other vegetation fires<br>- Animals                                                                                                                                                                                                                                                                                        | 3                 |
| <b>Mobile source</b>            | <b>Road transport</b>                         | - Passenger cars<br>- Light-duty vehicles<br>- Recreational vehicles<br>- Taxis<br>- Buses<br>- Special purpose vehicles<br>- Trucks<br>- Motorcycles                                                                                                                                                                                   | 18                |
|                                 | <b>Non-road transport</b>                     | - Construction machinery and equipment<br>- Agricultural machinery<br>- Ships<br>- Railways<br>- Aircrafts                                                                                                                                                                                                                              | 22                |

82 \*The numbers represent the number of sources.

83

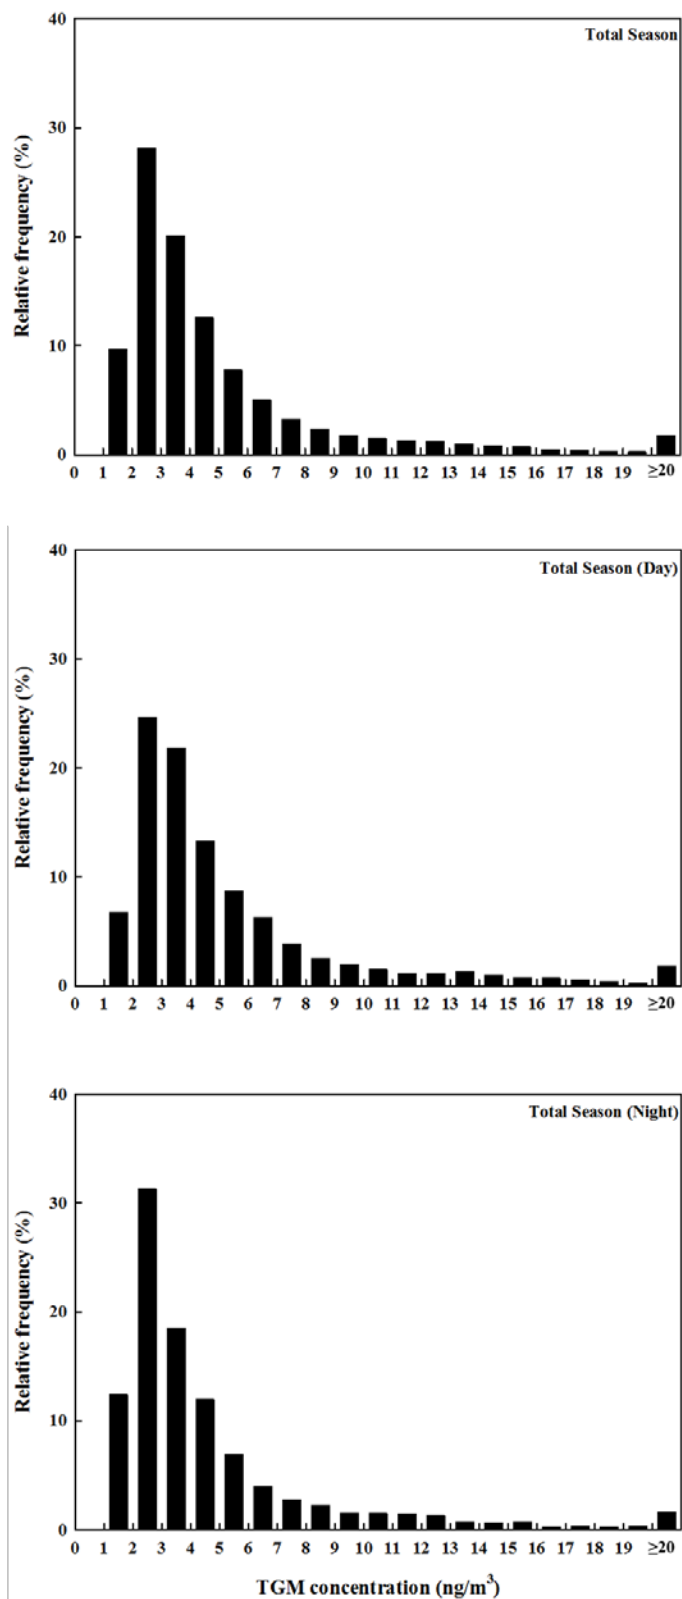

Fig. S3. Frequency distribution of TGM during sampling period. Note that TGM was measured every 5-min.

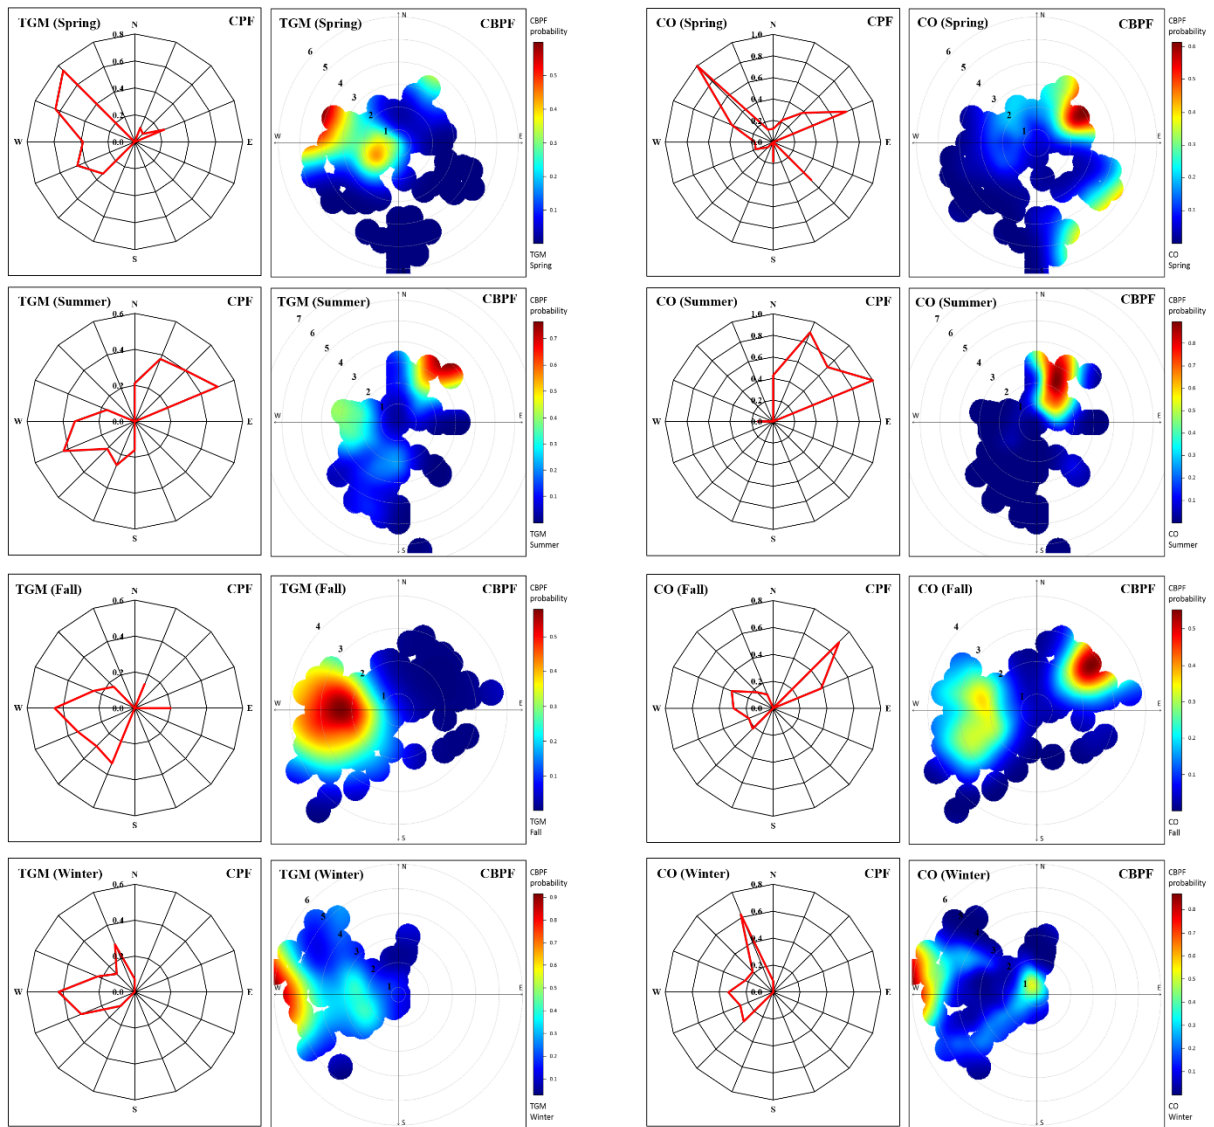

85

86 **Fig. S4. Comparisons of CPF and CBPF plots for TGM and CO higher than average**  
 87 **concentration. The radial axes of CPF and CBPF are the probability and the wind**  
 88 **speed ( $\text{m s}^{-1}$ ), respectively.**

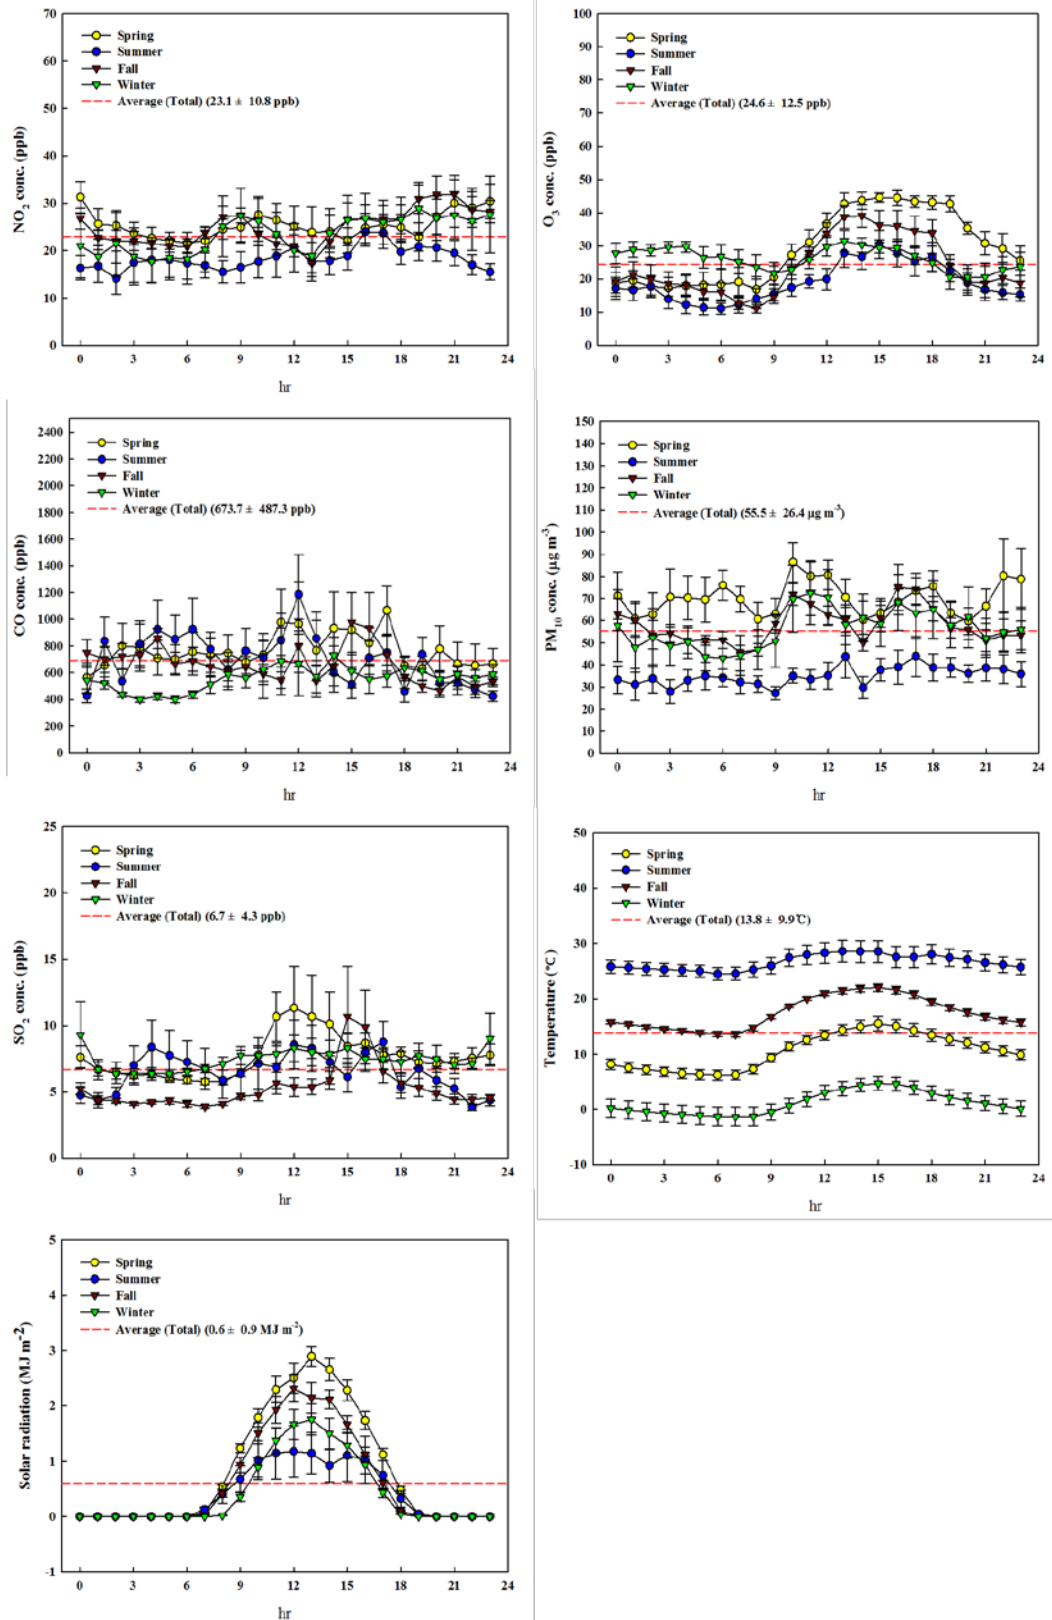

**Fig. S5.** The diurnal variations of co-pollutants concentrations and meteorological data during the sampling periods. The error bars represent standard error.

89  
90  
91  
92  
93



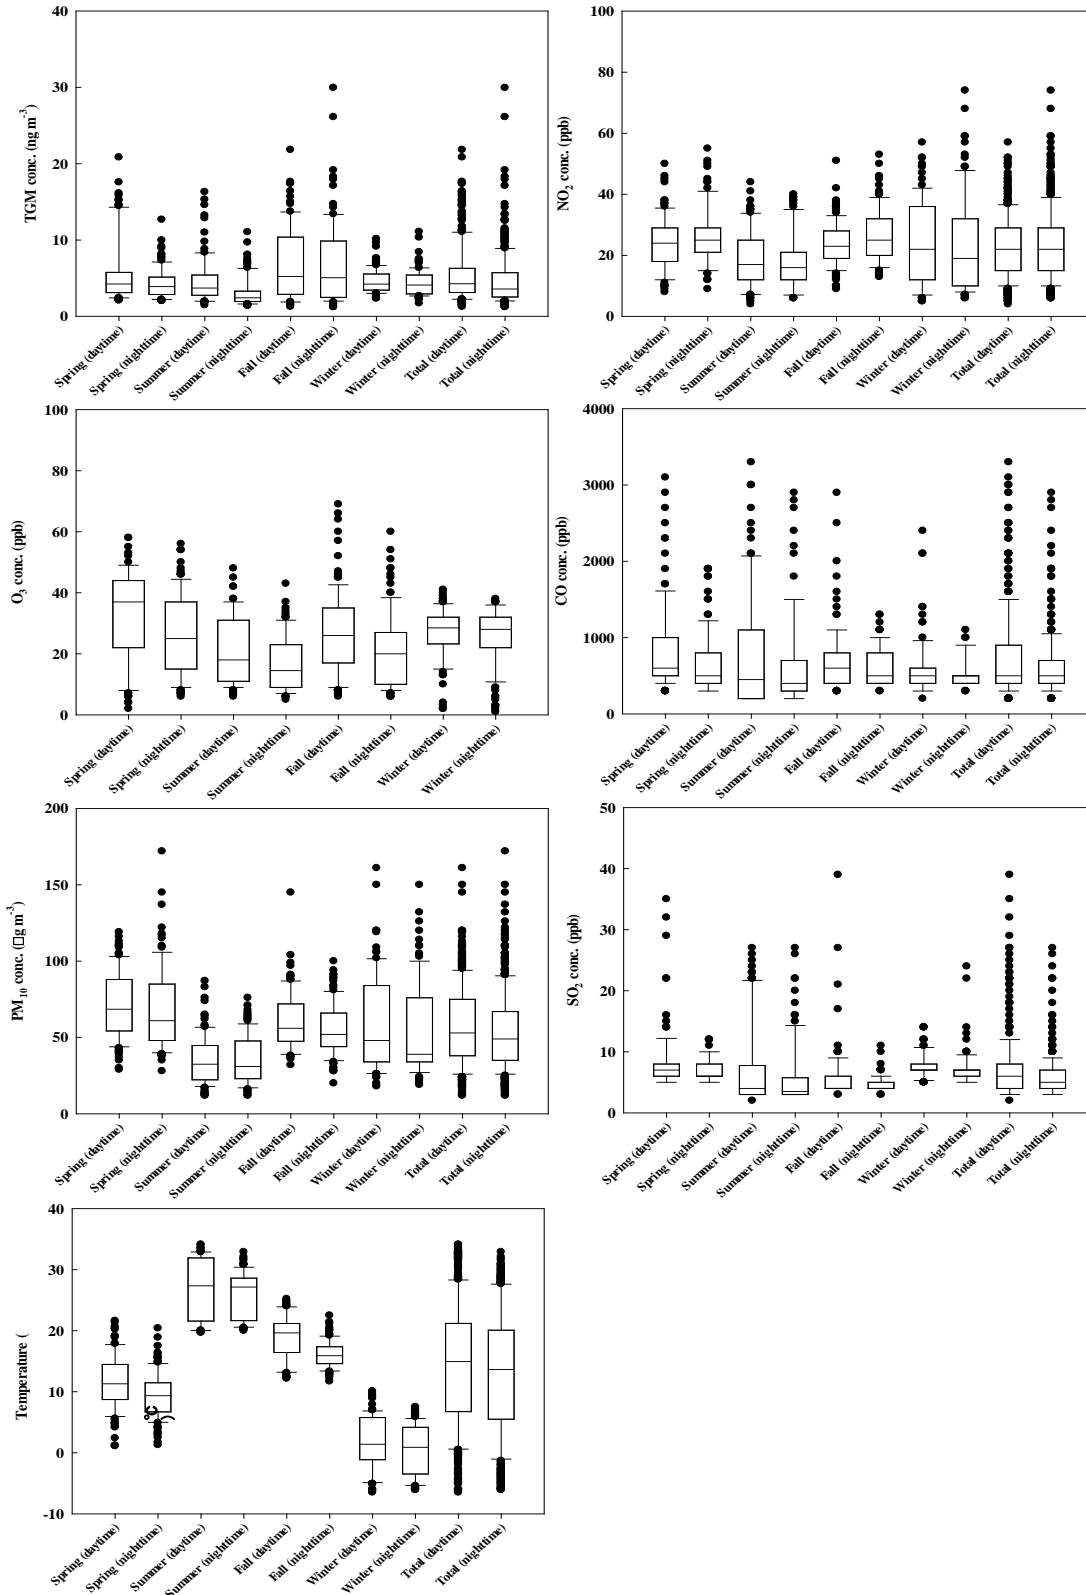

94

95 **Fig. S6. Comparison of TGM, co-pollutants and meteorological data between daytime**  
 96 **and nighttime. Note that TGM was presented with hourly average concentration.**
