# Supplementary material for: Characteristics of total gaseous mercury (TGM) concentrations in an industrial complex in southern Korea: Impacts from local sources
Source: Copernicus journal article supplement (doi:10.5194/acp-2015-939), 2016-01-18
Supplement: Supplementary file [file acp-2015-939-AC1-supplement.zip]

1 June 15, 2016

2  
3 Dear Editor,

4  
5 We appreciate the reviewers' suggestions which have considerably improved the manuscript  
6 (**acp-2015-939**). Enclosed are point-by-point responses to the reviewers. We hope that with  
7 these changes the manuscript will be suitable for publication in "**Atmospheric Chemistry**  
8 **and Physics**"

9  
10 Thank you very much.

11 Sincerely,

12 Seung-Muk Yi

13  
14 Professor, Dept. of Environmental Health, Graduate School of Public Health  
15 Seoul National University, 1 Gwanak-ro, Gwanak-gu, Seoul 151-742, South Korea  
16 Telephone: (82) 2-880-2736, Fax: (82) 2-762-9105, E-mail: yiseung@snu.ac.kr

## **Response to Anonymous Referees' Comments**

- Journal: ACP
- Title: Characteristics of total gaseous mercury (TGM) concentrations in an industrial complex in southern Korea: Impacts from local sources
- Author(s): Yong-Seok Seo, Seung-Pyo Jeong, Thomas M. Holsen, Young-Ji Han, Eunhwa Choi, Eun Ha Park, Tae Young Kim, Hee-Sang Eum, Dae Gun Park, Eunhye Kim, Soontae Kim, Jeong-Hun Kim, Jaewon Choi, Seung-Muk Yi
- MS No.: acp-2015-939
- MS Type: Research article
- Status: Final Response
- Special Issue: Data collection, analysis and application of speciated atmospheric mercury

**Response to Anonymous Referee #1:**

**General comments**

This study analyzed seasonal and diurnal variations of TGM at a sampling site in southern Korea. Sources of TGM affecting the sampling site were investigated by correlating TGM with other pollutants and meteorological data and applying several source-receptor methods utilizing wind direction and back trajectory data. A newer method called the conditional bivariate probability function (CBPF) was used in this study to identify sources of TGM. However, I did not find this method very effective at differentiating between ground and stack emission sources. I find that there are many uncertainties in the CBPF results as well as in the back trajectory results that haven't been addressed in this paper. I have concerns about the methodology (insufficient TGM data, selection of trajectory duration) and interpretation of correlation analysis results. A discussion of how the results vary in the different seasons was also lacking in many places of the paper, even though the results are shown in the figures. Overall, I find that a major revision of this paper is necessary.

**Response**

Thank you for your comments. We believe we have addressed your concerns in the detailed responses below.

**Specific comments**

**Comment 1**

Line 57 – the correlation coefficient of  $r = -0.08$  is very small. It's more accurate to state there is little correlation between TGM and air temperature

**Response 1**

As suggested, we have rephrased the sentence as follows on **Line 56-57**.

*“There was a **weak but** statistically significant negative correlation between the TGM concentration and ambient air temperature ( $r = -0.08$ ) ( $p < 0.05$ )”.*

**Comment 2**

Line 84 – “Atmospheric Hg released from natural and anthropogenic sources leading to

enhanced deposition” Please clarify this statement.

#### Response 2

As suggested, we have rephrased the sentence as follows on **Line 85-92**.

*“Atmospheric Hg released from natural and anthropogenic sources when introduced into terrestrial and aquatic ecosystem through wet and dry deposition (Mason and Sheu, 2002) can undergo various physical and chemical transformations before being deposited. Its lifetime in the atmosphere depends on its reactivity and solubility so that depending on its form it can have impacts on local, regional and global scales (Lin and Pehkonen, 1999; Lindberg et al., 2007). A portion of the Hg deposited in terrestrial environments through direct industrial discharge or atmospheric deposition is transported to aquatic system through groundwater and surface water runoff (Miller et al., 2013).”*

#### Comment 3

Lines 87-89 – Is this sentence about Hg emissions to the atmosphere and the biogeochemical cycling of Hg or the direct release of Hg from industrial effluent?

#### Response 3

We mean “the direct release of Hg from industrial effluent. In order to more clarify, we corrected “processes” to “**effluent**” on **Line 93-95**.

*“A previous study also reported that Hg directly released into terrestrial and aquatic ecosystems from industrial effluent has influenced surface water, sediment and biological tissue (Flanders et al., 2010).”*

#### Comment 4

Lines 94 – “coal combustion and waste incinerators” was already mentioned in this sentence.

#### Response 4

As suggested, we have rephrased the sentence as follows on **Line 97-100**.

*“...including municipal waste incinerators, medical waste incinerators, electric power generating facilities and cement kilns (Dvonch et al., 1998), ferrous and non-ferrous metal processing, iron and steel manufacturing facilities, and oil and coal combustion (Hoyer et al.,*

97 1995).”

98

99

100 **Comment 5**

101 Line 108 – use “data” instead of “information”

102 **Response 5**

103 As suggested, we corrected “information” to “data” as follows on **Line 114**.

104 “...combined with concentration **data** were used to identify...”

105

106 **Comment 6**

107 Line 138 – What temperature was the heated sampling line maintained at? Why is a heated sampling  
108 line necessary for sampling TGM?

109 **Response 6**

110 In this study, the sampling line was heated at about **50 °C** using heat tape to prevent  
111 condensation in gold traps because moisture on gold surface interferes with the amalgamation  
112 of Hg.

113 In order to more clarify, we have rephrased the sentence as follows on **Line 142-147**.

114

115 *“Ambient air at a flow rate of 1.5 L min<sup>-1</sup> was transported through a 3 m-long heated sampling*  
116 *line (1/4” OD Teflon) in to the analyzer. The sampling line was heated at about 50 °C using*  
117 *heat tape to prevent water condensation in the gold traps because moisture on gold surfaces*  
118 *interferes with the amalgamation of Hg (Keeler and Barres, 1999). Particulate matter was*  
119 *removed from the sampling line by a 47 mm Teflon filter.”*

120

121 **Comment 7**

122 2.3 QA/QC – the measurements were made for a one week period in each season. How often  
123 were the manual injections performed? Was there any maintenance activities performed prior  
124 to re-deployment of the instrument each time? These are important QA/QC procedures to  
125 mention because the instruments were offline for a long period of time.

126 **Response 7**

127 The reviewer is correct. In this study, manual injections were performed prior to every field  
128 sampling campaign and we continuously operated Tekran 2537B to measure GEM  
129 concentrations in the ambient air.

In order to avoid any confusion, we have rephrased the sentence as follows on **Line 159-160**.

*“Manual injections were performed prior to every field sampling campaign to evaluate these automated calibrations using a saturated mercury vapor standard.”*

**Comment 8**

Line 168 – This definition of CPF doesn’t seem right because it is not exactly the source contribution. You can replace this sentence with the one in line 177.

**Response 8**

The reviewer is correct. We have rephrased the sentence as follows on **Line 171-173**.

*“CPF estimates the probability that the measured concentration will exceed the threshold criterion for a given wind direction.”*

**Comment 9**

Lines 173-175 – were the wind data measured every 5 min similar to TGM or was it averaged to the nearest hour?

**Response 9**

In this study, **hourly** meteorological data (air temperature, relative humidity, and wind speed and direction) were obtained from the Automatic Weather Station (AWS) operated by the Korea Meteorological Administration (KMA) (<http://www.kma.go.kr>).

In order to clarify, we added “hourly” in the sentence as follows on **Line 150-152**.

*“**Hourly** meteorological data (air temperature, relative humidity, and wind speed and direction) were obtained from the Automatic Weather Station (AWS) operated by the Korea Meteorological Administration (KMA) (<http://www.kma.go.kr>) (6 km from the site).”*

This information was also described in Table 2 as follows on **Line 533-534**.

*“**Table 2.** Summary of atmospheric concentrations of TGM and co-pollutants, and meteorological data. Note that TGM was measured every 5-min, and other pollutants and*

meteorological data were measured every 1-hour.”

**Comment 10**

Lines 183-185 –How does this method account for the full distribution of concentrations rather than concentrations exceeding a threshold? Based on Eq. 2, CBPF analyzes the subset of concentrations above a threshold as well. Another thing is how does this method account for sources with different dispersion characteristics? The equation is based on horizontal wind speeds, which is advection rather than dispersion.

**Response 10**

The statement in question is incorrect since we used a criteria to determine which concentrations to include so we have deleted the sentence.

**Comment 11**

Lines 193-195 – This explanation is not clear. Can you give some examples of mercury sources with different wind speed dependencies?

**Response 11**

In order to more clarify, we rephrased the sentence as follows on **Line 195-198**.

*“The extension to the bivariate case can provide more information on the nature of the sources because different source types such as stack emission sources and ground-level sources can have different wind speed dependencies (prominent at low and high wind speed).”*

**Comment 12**

Lines 201-215 – this part needs to be rewritten by improving on the wording

**Response 12**

As suggested, we rephrased the sentence as follows on **Line 204-218**.

*“The PSCF is a simple method that links residence time in upwind areas with high concentrations through a conditional probability field and was originally developed by Ashbaugh et al. (1985).*

*PSCF<sub>ij</sub> is the conditional probability that an air parcel that passed through the ijth cell had a*

high concentration upon arrival at the monitoring site and is defined as the following Eq. (3).

$$PSCF_{ij} = \frac{m_{ij}}{n_{ij}} \quad (3)$$

where,  $n_{ij}$  is the number of trajectory segment endpoints that fall into the  $ij$ -th cell, and  $m_{ij}$  is the number of segment endpoints in the same grid cell ( $ij$ -th cell) when the concentrations are higher than a criterion value as measured at the sampling site.

High PSCF values in those grid cells are regarded as possible source locations. Cells including emission sources can be identified with conditional probabilities close to one if trajectories that have crossed the cells efficiently transport the released pollutant to the receptor site. Therefore, the PSCF model provides a tool to map the source potentials of geographical areas.”

### Comment 13

Line 220 –Please justify the use of 24 hr trajectories. TGM is mainly GEM which has a longer residence time and capable of long range transport. This means a longer trajectory duration would be more suitable.

### Response 13

In this study, 24h backward trajectories starting at every hour at a height of 10, 50 and 100 m above ground level were computed using the vertical velocity model because we identified the diurnal variations in TGM concentrations are due to a combination of 1) reactions with an oxidizing atmosphere, 2) changes in ambient temperature and 3) local emissions related to industrial activities. This information was described in [Line 422-424](#).

Previous studies reported that identified the long-range transport of mercury using the  $\Delta\text{TGM}/\Delta\text{CO}$  enhancement ratio (Choi et al., 2009; Jaffe et al., 2005; Kim et al., 2009; Weiss-Penzias et al., 2003; Weiss-Penzias et al., 2006). The observed  $\Delta\text{TGM}/\Delta\text{CO}$  was significantly lower than that of Asian long-range transport, but similar to that of local sources in Korea and in US industrial events suggesting that local sources are more important than that of long-range transport in this study. This information was also described in [Line 330-346](#).



Based on the above results, PSCF was performed to identify the local sources over grid cells corresponding to Gyeongsangbuk-do in eastern South Korea. In addition, we did not find significant differences between TPSCF using 24 h and 48 h backward trajectories (Fig R1).

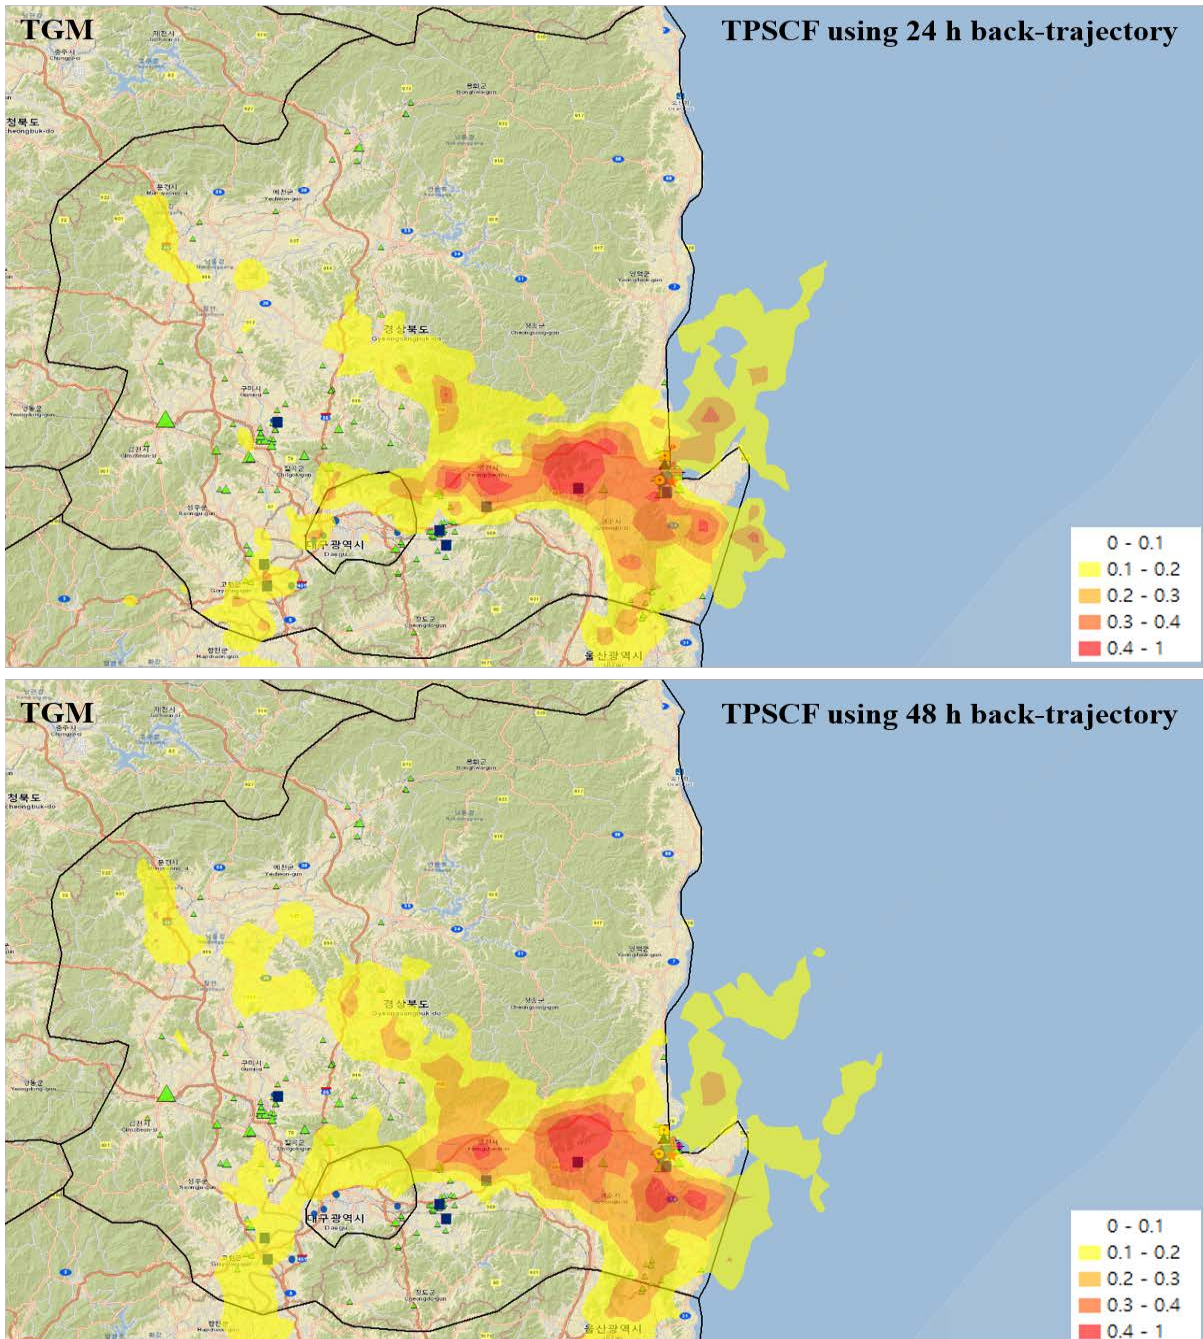

Fig. R1. Comparisons of TPSCF results using 24 h (top) and 48 h (bottom) backward trajectory.

In order to clarify, we have rephrased the sentence as follows on [Line 223-227](#).

“As will be discussed in Section 5.4, 24 h backward trajectories starting at every hour at a height of 10, 50, and 100 m above ground level were computed using the vertical velocity model because local sources are more important than that of long-range transport in this study (It should be noted that PSCF results using 48 h backward trajectories had similar results as the 24 h backward trajectories).”

**Comment 14**

Line 229 – should be “meteorological data”

**Response 14**

As suggested, we corrected “meteorology data” to “meteorological data” as follows on Line 235.

“PSCF was calculated with 9 km meteorological data”

**Comment 15**

Lines 293-294 – This point was not discussed in later sections

**Response 15**

We have deleted the phrase “As will be discussed later” and rephrased as follows on Line 306-308.

“The high TGM concentrations in fall was due to different wind direction (see Fig. S2), sources, relationships with other pollutants and meteorological conditions. More detailed information can be found in Section 5.5.”

**Comment 16**

Lines 299-302 – It should be stated more clearly that combustion was not a source of TGM because of a lack of correlation between TGM and the other combustion pollutant markers.

**Response 16**

As suggested, we have rephrased the sentence as follows on Line 313-315.

“However, the TGM concentration was not significantly correlated with NO<sub>2</sub>, CO or SO<sub>2</sub> concentrations, suggesting that combustion associated with space heating was not a significant source of TGM (Choi et al., 2009)”

**Comment 17**

Lines 315 – Fig. S4 shows the CPF and CBPF plots in each season. Should this be discussed in section 5.5? It’s not clear how these plots relate to the correlation results.

**Response 17**

In Section 5.3, we investigated the correlation between TGM and CO and found that local sources are more important than that of long-range transport by the observed  $\Delta\text{TGM}/\Delta\text{CO}$ . In order to avoid confusion, we have deleted Fig. S4 and rephrased the sentence as follows on Line 326 to Line 329.

“On the other hand, there were no statistically significant correlations between TGM and CO in spring ( $r = 0.02$ ) ( $p = 0.78$ ), in summer ( $r = 0.13$ ) ( $p = 0.08$ ), or in fall ( $r = -0.03$ ) ( $p = 0.69$ ), indicating that TGM and CO were affected by different anthropogenic emission sources in these seasons.”

**Comment 18**

Lines 326-333 – It’s surprising that long-range transport from China did not impact this site considering that it affected elevated Hg events in Seoul, Japan, and North America in previous studies. I would think long-range transport impacts a larger region including this sampling location. The TGM/CO slopes during elevated Hg events in Seoul were attributed to both long-range transport and local source impacts (Choi et al., 2009). Is it possible that the one-week sampling period in each season did not capture the long-range transport events? More data is needed to confirm these results. There are also uncertainties from the potential mixing between long-range transported airflows and local air making it difficult to distinguish between distant and local source impacts.

**Response 18**

We agree with the reviewer’s comment. We also think it is possible that the one-week sampling period in each season did not capture the long-range transport events, and more data are needed to confirm these results. Based on the previous studies (Kim et al., 2009; Choi et al., 2009), we analyzed the TGM data in an attempt to identify both long-range transport and local sources of

TGM. Unfortunately, we did not find high concentration events which were defined as at least a 10 h period with hourly average TGM and CO concentrations higher than the average monthly TGM and CO concentrations and high values of TGM/CO ratio ( $\Delta\text{TGM}/\Delta\text{CO}$ ) ( $0.0052\text{--}0.0158\text{ ng m}^{-3}\text{ ppb}^{-1}$ ) and high correlations ( $r^2 > 0.5$ ) in this study. Therefore, the observed  $\Delta\text{TGM}/\Delta\text{CO}$  suggested that local sources are more important than that of long-range transport in this study. However, we believe more can be learned using the larger dataset than just using the one-week sampling period.

In order to any confusion, we added a following sentence on [Line 347 to Line 351](#).

*“There are also uncertainties from the potential mixing between Hg associated with long-range transported airflows and local air making it difficult to distinguish between distant and local source impacts. However, it is possible that the one-week sampling period in each season did not capture the long-range transport events, and more can be learned using a larger dataset than just using the one-week sampling period to confirm these results.”*

#### **Comment 19**

Lines 345-346 – what are the time periods for daytime and nighttime concentrations? This sentence states daytime TGM were higher during daytime than nighttime. But in the previous sentence, the minimum TGM concentration occurs in the afternoon.

#### **Response 19**

As suggested, we added the time periods for daytime and nighttime as follows on [Line 355-356](#).

*“TGM,  $\text{O}_3$ , CO,  $\text{SO}_2$ , and temperature in the daytime (06:00-18:00) were statistically significantly higher than those in the nighttime (18:00-06:00) ( $p < 0.05$ ) except  $\text{PM}_{10}$  ( $p = 0.09$ )...”*

In this study, the daytime TGM concentration ( $5.3 \pm 4.7\text{ ng m}^{-3}$ ) was statistically significantly higher than that in nighttime ( $4.7 \pm 4.7\text{ ng m}^{-3}$ ) ( $p < 0.01$ ). In order to avoid any confusion, we corrected “maximum” to “**increase**” and “minimum” to “**decrease**” as follows on [Line 359 to Line 360](#).

“TGM generally showed a consistent diurnal variation with an increase in the early morning (06:00-09:00) and a decrease in the afternoon (14:00-17:00), similar to...”

**Comment 20**

Lines 353-355 – You discussed about the land-sea/lake breeze effect on TGM diel patterns from another study in the previous sentence. Does this atmospheric process affect this particular site since it is near the ocean and lower TGM were also observed during daytime?

**Response 20**

It is possible that the land-sea breeze might affect diurnal variations in TGM concentrations since the sampling site was near the ocean and lower TGM concentrations were observed during the daytime in this study. However, there are several known Hg sources such as iron and steel manufacturing facilities including electric and sintering furnaces using coking around the sampling site.

Although the daytime temperature ( $14.7 \pm 10.0$  °C) was statistically significantly higher than that in the nighttime ( $13.0 \pm 9.8$  °C) ( $p < 0.05$ ), the daytime TGM concentration ( $5.3 \pm 4.7$  ng m<sup>-3</sup>) was statistically significantly higher than those in the nighttime ( $4.7 \pm 4.7$  ng m<sup>-3</sup>) ( $p < 0.01$ ). This is possibly due to a combination of 1) reactions with an oxidizing atmosphere, 2) changes in ambient temperature and 3) local emissions related to industrial activities. To supplement these conclusions CPF and CBPF were used to identify source directions and TPSCF was used to identify potential source locations in “Section 5.6 CPF, CBPF and TPSCF results of TGM”.

In order to clarify, we rephrased the sentence as follows on **Line 376 to Line 384**.

“Although it is possible that the land-sea breeze may affect diurnal variations in TGM concentrations since the sampling site was near the ocean and lower TGM were also observed



during the daytime, the higher concentrations in the daytime than those in nighttime were due to local emission sources because the daytime temperature ( $14.7 \pm 10.0$  °C) was statistically significantly higher than that in the nighttime ( $13.0 \pm 9.8$  °C) (t-test,  $p < 0.05$ ) and there was a weak but statistically significant negative correlation between TGM concentration and ambient air temperature ( $r = -0.08$ ) ( $p < 0.05$ ). In addition, there are several known Hg sources such as iron and steel manufacturing facilities including electric and sintering furnaces using coking between the sampling site and the ocean.”

**Comment 21**

Lines 355-356 – The negative correlation between TGM and temperature is very small (as mentioned in the abstract,  $r = -0.08$ ) despite a significant p-value. It’s more accurate to state there is little relationship between TGM and air temperature.

**Response 21**

As suggested, we have rephrased the sentence as follows on **Line 380-382**.

“... and there was a weak but statistically significant negative correlation between the TGM concentration and ambient air temperature ( $r = -0.08$ ) ( $p < 0.05$ )”.

**Comment 22**

Lines 357-360 – Similar to the above comment, the correlation between TGM and O<sub>3</sub> is too small ( $r = -0.18$ ) to suggest that it is indicative of GEM oxidation. It’s more correct to state there is little relationship between TGM and O<sub>3</sub>. If GEM oxidation occurred, GOM concentrations would increase. There are some uncertainties on the net effect on TGM (GEM+GOM).

**Response 22**

As suggested, we have rephrased the sentence as follows on **Line 385-393**.

“...there was a weak but negative relationship between the TGM concentrations and O<sub>3</sub> concentrations ( $r = -0.18$ ) ( $p < 0.01$ ), suggesting that oxidation of GEM in the oxidizing atmosphere during periods of strong atmospheric mixing was partially responsible for the diurnal variations of TGM concentrations. In addition, oxidation of GEM by bromine species

in the coastal area (Obrist et al., 2011) or by chloride radicals in marine boundary layer (Laurier et al., 2003) might play a significant role. If oxidation of GEM occurred, GOM concentrations would increase. However there are uncertainties on the net effects on TGM (the sum of the GEM and the GOM) since we did not measure GOM concentrations.”

#### **Comment 23**

Lines 369-378 – The results here are inconsistent. If the small negative correlation between TGM and temperature indicates an increase in mixing height which leads to a decrease in TGM, how can it explain surface emissions in the morning which should increase with temperature? Is there a positive correlation between TGM and temperature in the morning?

#### **Response 23**

As suggested, we analyzed a relationship between TGM and temperature in the morning (06:00-09:00) and found that there is a positive correlation between TGM and ambient air temperature. In order to clarify, we added a following sentence on **Line 408-412**.

“Nonparametric correlations revealed that there is a positive correlation between TGM and ambient air temperature ( $r_s = 0.11$ ,  $p=0.27$ ) between 06:00-09:00. The TGM concentration was negatively correlated with  $O_3$  ( $r_s = -0.33$ ,  $p<0.01$ ) but positively correlated with  $NO_2$  ( $r_s = 0.21$ ,  $p<0.05$ ), suggesting that the increased traffic is the main source of TGM during these time periods.”

#### **Comment 24**

Section 5.4 – This section is lacking discussion on seasonal differences in the diurnal variation. The fall diurnal pattern appears very different from those in other seasons in Fig. 3. Can you discuss why the TGM were much higher overnight in the fall but daytime concentrations were similar to those in other seasons? Why was there a large drop in TGM from 4:00 to 5:00 in the fall?

#### **Response 24**

As suggested, we described more detailed information on **Line 413-421** as follows.

“Compared to other seasons, significantly different diurnal variations of TGM were observed

in fall. The daytime TGM concentrations in fall were similar to those in other seasons, however, the nighttime TGM concentrations in fall were much higher than other seasons. As described earlier in Section 5.3, the high TGM concentrations in fall was possibly due to the relationship between other pollutants and meteorological conditions as well as different wind direction and sources. The nighttime TGM concentrations in fall were simultaneously positively correlated with  $PM_{10}$  ( $r=0.26$ ) ( $p<0.05$ ) and  $CO$  ( $r=0.21$ ) ( $p<0.05$ ) concentrations and wind speed ( $r=0.35$ ) ( $p<0.01$ ), suggesting that the combustion process is an important source during this period.”

We could not identify the reason why there was a large drop in TGM from 4:00 to 5:00 in the fall because there were a limited amount of data. However, we believe more can be learned using a larger dataset.

#### **Comment 25**

Lines 381-383 – These conclusions are not well-supported by the correlation analyses because the correlation coefficients were very small.

#### **Response 25**

As suggested, we rephrased the “Section 5.5 *Diurnal variations*” on Line 353-426.

#### **Comment 26**

Line 390 – What are the potential Hg sources from the northeast direction?

#### **Response 26**

The potential Hg sources from the northeast direction is due to lots of domestic passenger ships routes. In response to this comment, we have rephrased the sentence as follows on Line 469-471.

“The northeast direction including the East Sea was also identified as potential source areas likely because this is an area with lots of domestic passenger ships routes.”

#### **Comment 27**



Lines 391-393 – Please clarify this sentence. Are the higher wind speeds associated with stack emissions and lower wind speeds associated with surface emissions? There are several issues or uncertainties with this point. (1) Wind speeds were only measured at one height. How can you tell that the lower wind speeds are from lower elevation and vice-versa? What is the height of the wind measurements? (2) As mentioned in the diurnal variation section, boundary layer mixing occurs during the day. Is it possible to distinguish between ground emissions and stack emissions? (3) It seems only the west directions had both high and low wind speeds, while the east directions had only lower wind speeds (Fig. S1). Thus, CBPF doesn't seem useful when there is a lack of wind speed variation. It appears that it is by coincidence that both ground level and stack emissions were identified in the west direction because there happened to be a wind speed variation from this direction. Based on these points, the CBPF results don't seem to reveal more about TGM sources than CPF. More discussion is needed on the relationship between specific sources and wind speeds. Instead of wind speed, what other variables would be useful for source identification using CBPF?

#### Response 27

In this study, hourly meteorological data (air temperature, relative humidity, and wind speed and direction) were obtained from the Automatic Weather Station (AWS) operated by the Korea Meteorological Administration (KMA) (<http://www.kma.go.kr>). This information was described on Line 150-152. We used the wind data measured at a reference height of 10 m.

Although there is a lack of wind speed variation, we found that the CBPF revealed more about TGM sources than CPF (Fig. S6).

The third variable plotted on the radial axis does not need to be wind speed. A previous study reported that temperature can be a useful radial variable (Carslaw, D.C., Beevers, S.D., 2013. Characterising and understanding emission sources using bivariate polar plots and k-means clustering. Environ. Model. Softw. 40 (0), 325-329).

In order to response to this comment, we rephrased the sentence on Line 195-198 and Line 433-450 as follows.

< Line 195-198 >

*“The extension to the bivariate case can provide more information on the nature of the sources because different source types such as stack emission sources and ground-level sources can have different wind speed dependencies (prominent at low and high wind speed).”*

< Line 433-450>

*“CBPF shows that the high probabilities from the west occurred under high wind speed ( $> 3 \text{ m s}^{-1}$ ) indicative of emissions from stacks as well as low wind speed ( $\leq 3 \text{ m s}^{-1}$ ) indicative of non-buoyant ground level sources (Uria-Tellaetxe and Carslaw, 2014)”*

*As described in Section 5.4, correlations between TGM and CO revealed that TGM and CO were affected by similar anthropogenic emission sources in winter but affected by different sources in spring, summer and fall, which is supported by Fig. S6 which shows significantly different seasonal patterns of CPF and CBPF for TGM concentrations.*

*It is difficult to discuss about the different seasonal patterns of CPF and CBPF for TGM concentrations since there were no correlations between TGM and other pollutants in spring, summer and fall. However, compared to Fig. 4, the CPF and CBPF patterns in fall were similar to those during the whole sampling periods. Especially, the nighttime TGM concentration in fall was simultaneously positively correlated with PM10 ( $r=0.26$ ) ( $p<0.05$ ) and CO ( $r=0.21$ ) ( $p<0.05$ ) concentrations and wind speed ( $r=0.35$ ) ( $p<0.01$ ), indicating that the combustion process from the west is an important source during this period.*

*Since TGM showed a significant correlation with CO ( $r=0.25$ ) ( $p<0.05$ ) and showed a weak positive correlation with PM10 ( $r=0.08$ ) ( $p=0.33$ ) in winter, the combustion source from the west is partially responsible for this result with high wind speed.”*

#### **Comment 28**

Lines 394-395 – Are there industrial sources south of the sampling site? High probability areas are also identified in this direction in the TPSCF plot in Fig. 4.

#### **Response 28**

There is Ulsan Metropolitan City located to the south from the sampling site. Ulsan is South Korea’s seventh largest metropolis with a population of over 1.1 million and it has more than 700 small and large industrial facilities including petrochemical plants, oil refineries, vehicle and ship factories, and other chemical plants.

In response to this comment, we have added a following sentence on **Line 471 to Line 474**.

*“The south from the sampling was also identified as a likely source area of TGM where Ulsan Metropolitan City, South Korea’s seventh largest metropolis with a population of over 1.1 million is located. It includes a large petrochemical complex known as a TGM source (Jen et al., 2013).”*

#### **Comment 29**

Fig. 4 – the source areas seem confined to the industrial complex near the sampling site because of the short trajectory duration (24 hrs). Use of longer trajectories would help expand the source region and identify potential regional transport to the site. In addition to this uncertainty, other PSCF uncertainties should be discussed.

#### **Response 29**

As mentioned earlier in **Response 13**, local sources are more important than that of long-range transport in this study. Therefore PSCF was performed to identify the local sources over grid cells corresponding to Gyeongsangbuk-do in eastern South Korea.

In addition, we did not find significant differences between PSCF using 24 h and 48 h backward trajectories (Fig. R1 in **Response 13**).

In addition, previous studies suggest that **there are increasing uncertainties as backward trajectory distances increase** (Stohl, et al., 2002) and that PSCF modeling is prone to the trailing effect is which locations upwind of sources are also identified as potential sources (Han, et al., 2004a). An alternative to back trajectory calculations in the interpretation of atmospheric trace substance measurements (Stohl, et al., 2002) although this technique does not provide much information on source locations.

#### **Comment 30**

Section 5.5 – This section is lacking discussion on the CPF and CBPF results in different seasons. The seasonal plots are shown in Fig. S4, but they are not discussed in this section.

#### **Response 30**

In order to response to this comment, we added the sentence as follows on **Line 437-450**.

553 *“As described in Section 5.4, correlations between TGM and CO revealed that TGM and CO*  
554 *were affected by similar anthropogenic emission sources in winter but affected by different*  
555 *sources in spring, summer and fall, which is supported by Fig. S6 which shows significantly*  
556 *different seasonal patterns of CPF and CBPF for TGM concentrations.*  
557 *It is difficult to discuss about the different seasonal patterns of CPF and CBPF for TGM*  
558 *concentrations since there were no correlations between TGM and other pollutants in spring,*  
559 *summer and fall. However, compared to Fig. 4, the CPF and CBPF patterns in fall were similar*  
560 *to those during the whole sampling periods. Especially, the nighttime TGM concentration in*  
561 *fall was simultaneously positively correlated with PM10 ( $r=0.26$ ) ( $p<0.05$ ) and CO ( $r=0.21$ )*  
562 *( $p<0.05$ ) concentrations and wind speed ( $r=0.35$ ) ( $p<0.01$ ), indicating that the combustion*  
563 *process from the west is an important source during this period.*  
564 *Since TGM showed a significant correlation with CO ( $r=0.25$ ) ( $p<0.05$ ) and showed a weak*  
565 *positive correlation with PM10 ( $r=0.08$ ) ( $p=0.33$ ) in winter, the combustion source from the*  
566 *west is partially responsible for this result with high wind speed.”*

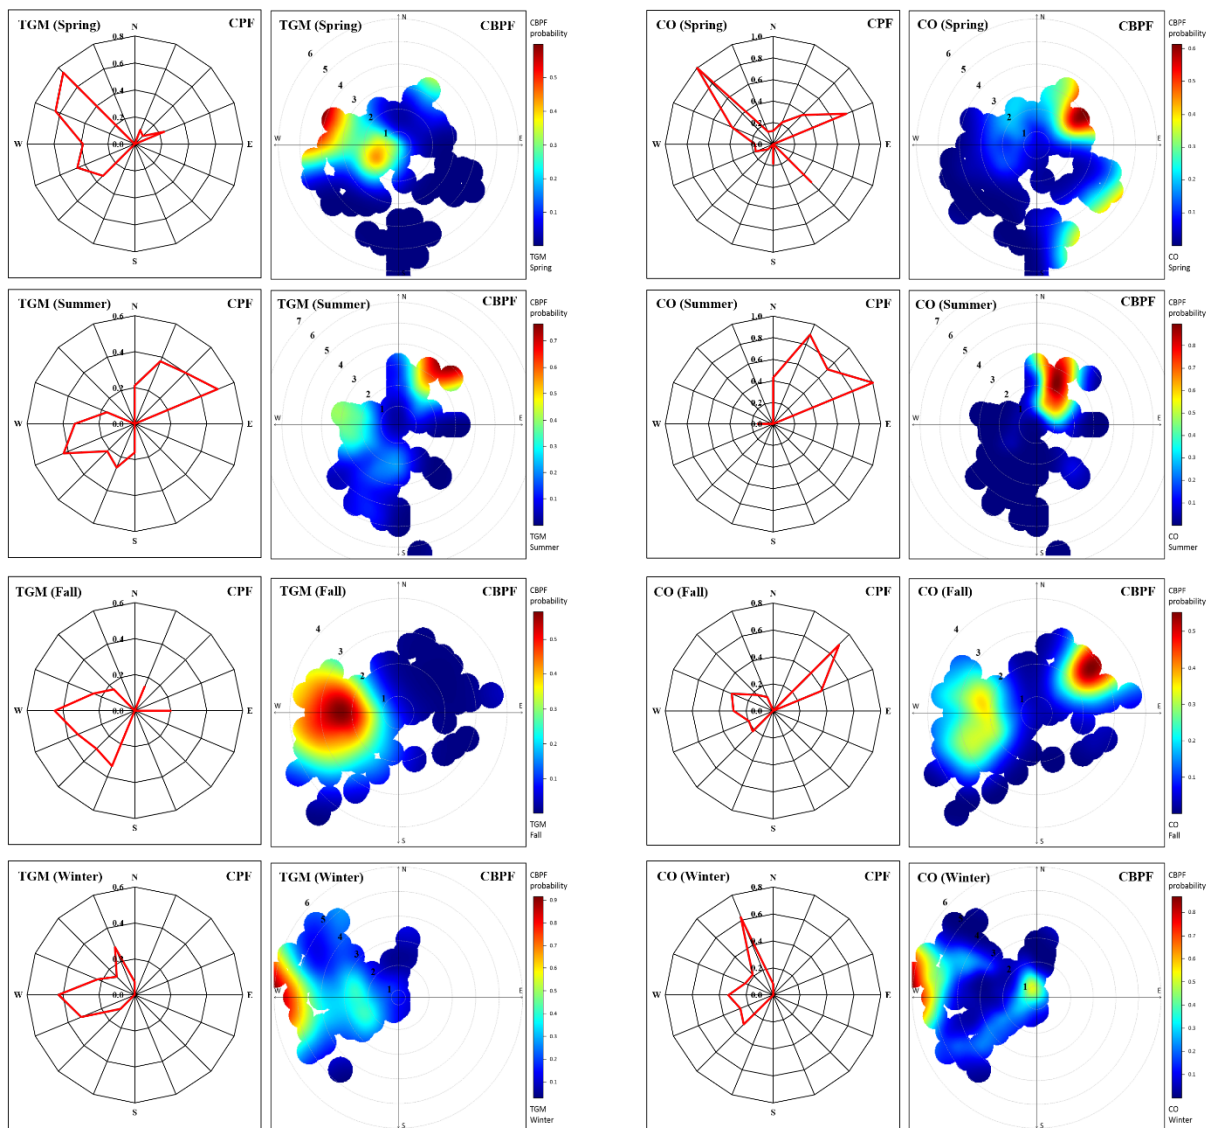

**Fig. S6. Comparisons of CPF and CBPF plots for TGM and CO higher than average concentration. The radial axes of CPF and CBPF are the probability and the wind speed ( $\text{m s}^{-1}$ ), respectively.**

### Comment 31

Lines 421-423 – This conclusion was not discussed in the results section. The wind direction frequency plots in different seasons are shown in Fig. S1 but the results were not discussed in the paper.

### Response 31

As suggested, we rephrased the sentence on Line 413-421 as follows.

**Comment 32**

Lines 427-430 – p-value was significant but the correlation coefficient (magnitude of the relationship) is too small. I also don't understand the logic in these results. There should be a positive TGM and temperature correlation if daytime TGM concentrations were related to surface emissions.

**Response 32**

In response to this comment, we have rephrased the sentence on **Line 363-371** and **Line 376-384** as follows.

< **Line 363-371** >

*“The daytime TGM concentration ( $5.3 \pm 4.7 \text{ ng m}^{-3}$ ) was higher than that in nighttime ( $4.7 \pm 4.7 \text{ ng m}^{-3}$ ) ( $p < 0.01$ ), which was similar to several previous studies (Cheng et al., 2014; Gabriel et al., 2005; Nakagawa, 1995; Stamenkovic et al., 2007) but different than other study (Lee et al., 1998). Previous studies reported that this is due to local sources which is close to the sampling site (Cheng et al., 2014; Gabriel et al., 2005), positive correlation between TGM concentration and ambient air temperature (Nakagawa, 1995) and increased traffic (Stamenkovic et al., 2007). However, other study suggested that the higher TGM concentration than that in daytime was due to the shallow boundary layer in nighttime, resulting in concentrating the TGM near the surface (Lee et al., 1998).”*

< **Line 376-384** >

*“Although it is possible that the land-sea breeze may affect diurnal variations in TGM concentrations since the sampling site was near the ocean and lower TGM were also observed during the daytime, the higher concentrations in the daytime than those in nighttime were due to local emission sources because the daytime temperature ( $14.7 \pm 10.0 \text{ }^{\circ}\text{C}$ ) was statistically significantly higher than that in the nighttime ( $13.0 \pm 9.8 \text{ }^{\circ}\text{C}$ ) ( $t$ -test,  $p < 0.05$ ) and there was a weak but statistically significant negative correlation between TGM concentration and ambient air temperature ( $r = -0.08$ ) ( $p < 0.05$ ). In addition, there are several known Hg sources such as iron and steel manufacturing facilities including electric and sintering furnaces using coking around the sampling site.”*

**Comment 33**

Line 434 – JP-PSCF was not used anywhere else in the paper. Did you mean TPSCF?

616           **Response 33**

617    The reviewer is correct. As suggested, we corrected “JP-PSCF” to “TPSCF” as follows on **Line**  
618    **497**.

619    *“However, CBPF and TPSCF indicated that...”*

620

**Response to Anonymous Referee #2:**

**General comments**

This study measured TGM concentrations in South Korea and analyzed seasonal and diurnal variations of TGM. They also used the statistics analysis to correlate TGM with other pollutants and meteorological data. They tried to identify the possible TGM sources using CPF, CBPF, and TPSCF models. They found that the nearby local sources are more significant than others. Over all, this paper meets the original contributions and contains unique TGM data nearby industrial areas. The authors performed the appropriate modeling approaches to identify possible mercury sources. However, the presentation quality doesn't meet the ACP's requirement. I suggest that the paper should be carefully revised and edited prior to publication on ACP.

Comment

**Response**

Thank you for your comments. We carefully revised and edited that paper as suggested as is detailed in our responses to the specific comments.

**Specific comments**

Introduction section contains too basic and out of dated information. I suggest adding some recent mercury inventory/modeling studies in East Asia. Result and discussion contains unnecessarily much literature review. More discussions are needed. The author used statistics analysis in many places. Please provide the type of analysis in this paper.

**Comment 1**

Line 118 – 133: it should be combined into one paragraph.

**Response 1**

As suggested, the sentence was combined into one paragraph as follows on **Line 125-138**.

**Comment 2**

Line 133: So what are their results in Kim et al. 2010? What did they find?

**Response 2**

This meant that we got and used the Hg emissions data from the authors (Kim et al., 2010)



654 about iron and steel manufacturing, and a hazardous waste incinerator.

655 In order to clarify, we have revised the sentence as follows on **Line 137 to Line 138**.

656

657 “Hg emissions data from iron and steel manufacturing, and a hazardous waste incinerator  
658 were estimated based on a previous study (Kim et al., 2010)”

659

660 Their results in Kim et al. (2010) were described in **Line 104-109**.

661

662

663 **Comment 3**

664 Line 146-151: it doesn’t fit in material & method section. Please move to results & discussion  
665 section.

666 **Response 3**

667 As suggested, we moved that sentence to “5. Results and Discussions” on **Line 275-280** as  
668 follows.

669

670 “5.1. Meteorological data analysis

671 *Fig. S2 shows the frequency of counts of measured wind direction occurrence by season*  
672 *during the sampling period. The predominant wind direction at the sampling site was W (20.9%)*  
673 *and WS (19.2%), and calm conditions of wind speed less than 1 m s<sup>-1</sup> occurred 7.6% of the*  
674 *time. Compared to other seasons, however, the prevailing winds in summer were N (17.0%),*  
675 *NE (16.4%), S (16.4%), and SW (15.8%).”*

676

677

678 **Comment 4**

679 Line 156-157: need to explain how often manual injections were conducted.

680 **Response 4**

681 Manual injections were performed prior to every field sampling campaign and we continuously  
682 operated Tekran 2537B to measure GEM concentrations in the ambient air.

683 In order to avoid any confusion, we have rephrased the sentence as follows on **Line 159 to Line**  
684 **160**.

685

686 *“Manual injections were performed prior to every field sampling campaign to evaluate these*  
687 *automated calibrations using a saturated mercury vapor standard.”*

688

689 **Comment 5**

690 Line 164: already used CPF in Line 163. Replace “Conditional Probability Function  
691 (CPF)” with “CPF”

692 **Response 5**

693 As suggested, “Conditional Probability Function (CPF)” was replaced with CPF on **Line 168**.

694

695

696 **Comment 6**

697 Line 220 – 222 and line 230 – 233 are same.

698 **Response 6**

699 The sentence on Line 220-222 means that we computed 24hr backward trajectories starting at  
700 every hour at a height of 10, 50, and 100 m above ground level.

701 The sentence on Line 230-233 means that TPSCF which incorporates probability from above  
702 different starting heights (10, 50, and 100 m above ground level) was calculated.

703

704 In order to more clarify, we rephrased the sentence as follows on **Line 236-237**.

705

706 *“In this study, TPSCF which incorporates probability from above different starting heights was*  
707 *calculated...”*

708

709 **Comment 7**

710 Line 237: what is  $n_{ij}$  values here?

711 **Response 7**

712  $n_{ij}$  is the number of trajectory segment endpoints that fall into the  $ij$ -th cell. This information  
713 was described in the sentence on **Line 212**.

714 In order to clarify, we added “the number of trajectory segment endpoints that fall into the  $ij$ -  
715 th cell” to the sentence on **Line 243** as follows.

716

717 *“To minimize the effect of small  $n_{ij}$  (the number of trajectory segment endpoints that fall into*

718 *the ij-th cell) values, resulting in high TPSCF values ....”*

719

720

721 **Comment 8**

722 Line 272-275: Can the author provide recent TGM data from China and other country?

723 **Response 8**

724 As suggested, we added recent TGM data from China and other countries in Table 1 on **Line**  
725 **531** and rephrased the sentence on **Line 287-288**.

726

727 “...and those measured in China, in Japan and other locations in Korea, however considerably  
728 lower than those measured near large Hg sources in Guangzhou, China (Table 1).”

729

730

731 **Comment 9**

732 Line 285 and later: if the author mentioned p-value ( $p < 0.01$  or  $p < 0.05$ ), “statistically  
733 significantly” does not have to be addressed every time. Readers already know that the author  
734 performed statistical analysis.

735 **Response 9**

736 After Line 285, we deleted the phrase “statistically significantly” as suggested (after **Line 298**).

737

738

739 **Comment 10**

740 Line 293: “as will be discussed later: : :.” Can you indicate where and which section it was  
741 discussed?

742 **Response 10**

743 We have deleted the phrase “As will be discussed later” as follows on **Line 306**.

744

745 “The high TGM concentrations in fall was due to ...”

746

747

748 **Comment 11**

749 This 5.4 section is for result and discussion. It includes too much literature review rather than  
750 discussion.

**Response 11**

As suggested, we rephrased the 5.4 section as following Section “5.5. *Diurnal variations*” on Line 353-426.

**Comment 12**

Line 346 – 348: can you explain what previous studies concluded about these diurnal variations? Needs more discussion.

**Response 12**

As suggested, we rephrased the sentence on Line 363-371 as follows.

*“The daytime TGM concentration ( $5.3 \pm 4.7 \text{ ng m}^{-3}$ ) was higher than that in the nighttime ( $4.7 \pm 4.7 \text{ ng m}^{-3}$ ) ( $p < 0.01$ ), which was similar to several previous studies (Cheng et al., 2014; Gabriel et al., 2005; Nakagawa, 1995; Stamenkovic et al., 2007) but different than another studies (Lee et al., 1998). Previous studies reported that this different is due to local sources close to the sampling site (Cheng et al., 2014; Gabriel et al., 2005), a positive correlation between TGM concentration and ambient air temperature (Nakagawa, 1995) and increased traffic (Stamenkovic et al., 2007). However, another study suggested that the higher TGM concentration during the night was due to the shallowing of the boundary layer, which concentrated the TGM near the surface (Lee et al., 1998)”*

**Comment 13**

Line 353: “as will be discussed later...” Indicate where and which section it was discussed? What is “this” mean here? Does “this” mean lower TGM in daytime?

**Response 13**

In order to clarify, we have rephrased the sentence on Line 376-384 as follows.

*“Although it is possible that the land-sea breeze may affect diurnal variations in TGM concentrations since the sampling site was near the ocean and lower TGM were also observed during the daytime, the higher concentrations in the daytime than those in nighttime were due to local emission sources because the daytime temperature ( $14.7 \pm 10.0 \text{ }^{\circ}\text{C}$ ) was statistically significantly higher than that in the nighttime ( $13.0 \pm 9.8 \text{ }^{\circ}\text{C}$ ) ( $t$ -test,  $p < 0.05$ ) and there was a weak but statistically significant negative correlation between TGM concentration and ambient*

784 *air temperature ( $r = -0.08$ ) ( $p < 0.05$ ). In addition, there are several known Hg sources such*  
785 *as iron and steel manufacturing facilities including electric and sintering furnaces using coking*  
786 *between the sampling site and the ocean.”*

787  
788 **Comment 14**

789 Line 355 – 356 and line 369 – 370 are same. Please rephrase or rewrite.

790 **Response 14**

791 As suggest, we rephrased the sentence as follows on **Line 400-401**.

792  
793 *“TGM concentration was negatively correlated with ambient air temperature ( $r = -0.08$ ) ( $p <$*   
794 *0.05) because high ambient air temperature...”*

795  
796  
797 **Comment 15**

798 Line 369 – 378: this paragraph is vague. Please clarify.

799 **Response 15**

800 In response to this comment, we added a following sentence as follows on **Line 408-412**.

801  
802 *“Nonparametric correlations revealed that there is a positive correlation between TGM and*  
803 *ambient air temperature ( $r_s = 0.11$ ,  $p=0.27$ ) between 06:00-09:00. The TGM concentration*  
804 *was negatively correlated with  $O_3$  ( $r_s = -0.33$ ,  $p<0.01$ ) but positively correlated with  $NO_2$  ( $r_s$*   
805 *= 0.21,  $p<0.05$ ), suggesting that the increased traffic is the main source of TGM during these*  
806 *time periods.”*

807  
808 **Comment 16**

809 This 5.5 section also has too much literature review rather than discussion.

810 **Response 16**

811 As suggested, we rephrased the Section 5.5 as follows on **Line 428-474** (see the Section 5.6.  
812 *CPF, CBPF and TPSCF results of TGM)*

813  
814 **Comment 17**

815 Line 381 – 385: this paragraph is the result from the Section 5.4. Please move it to Section 5.4.

816 **Response 17**

817 As suggested, we moved the paragraph to **Line 422 to Line 426**.

818

819 **Comment 18**

820 Line 388 – 389: is this the only result from CPF model? Please explain the reason to adopt this  
821 model?

822 **Response 18**

823 We showed the CBPF result as well as CPF result. This information was described in the  
824 sentence on **Line 433 to Line 436** as follows.

825

826 “...CBPF shows that the high probabilities from the west occurred under high wind speed ( $> 3$   
827  $m s^{-1}$ ) indicative of emissions from stacks as well as low wind speed ( $\leq 3 m s^{-1}$ ) indicative of  
828 non-buoyant ground level sources (Uria-Tellaetxe and Carslaw, 2014).”

829

830 **Comment 19**

831 Line 391-393: Needs more detail explanations to clarify.

832 **Response 19**

833 In order to clarify, we rephrased the sentence on **Line 433 to Line 436** as follows.

834

835 “CBPF shows that the high probabilities from the west occurred under high wind speed ( $> 3$   
836  $m s^{-1}$ ) indicative of emissions from stacks as well as low wind speed ( $\leq 3 m s^{-1}$ ) indicative of  
837 non-buoyant ground level sources (Uria-Tellaetxe and Carslaw, 2014).”

838

839

840 **Comment 20**

841 Line 434: is it “TPSCF”?

842 **Response 20**

843 The reviewer is correct. As suggested, we corrected “JP-PSCF” to “TPSCF”.

844

845

846 **Comment 21**

847 Line 434 – 436: the author mentioned that CPF only can provide high probabilities from the  
848 west of the site. Please delete the CPF in this sentence.

849 **Response 21**

850 In order to response to this comment, we rephrased the sentence as follows on **Line 495-499**.

851

852 *“CPF only shows high probabilities to the west from the sampling site where there are large*  
853 *steel manufacturing facilities and waste incinerators. However, CBPF and TPSCF indicated*  
854 *that the dominant sources of TGM were the hazardous waste incinerators and the coastal areas*  
855 *in the northeast as well as the iron and manufacturing facilities in the west.”*

856

857

858 **Comment 22**

859 Line 436 – 437: same sentence as Line 412 – 413. Please rephrase or rewrite.

860 **Response 22**

861 As suggested, we rephrased the sentence on **Line 436-437** as a following sentence on **Line 499**  
862 **to 500**.

863

864 *“The domestic passenger ships routes in the East Sea were also identified as possible source*  
865 *areas.”*

**Characteristics of total gaseous mercury (TGM) concentrations in an industrial complex in southern Korea: Impacts from local sources**

Yong-Seok Seo<sup>1,2</sup>, Seung-Pyo Jeong<sup>1</sup>, Thomas M. Holsen<sup>3</sup>, Young-Ji Han<sup>4</sup>, Eunhwa Choi<sup>5</sup>, Eun Ha Park<sup>1</sup>, Tae Young Kim<sup>1</sup>, Hee-Sang Eum<sup>1</sup>, Dae Gun Park<sup>1</sup>, Eunhye Kim<sup>6</sup>, Soontae Kim<sup>6</sup>, Jeong-Hun Kim<sup>7</sup>, Jaewon Choi<sup>8</sup>, Seung-Muk Yi<sup>1,2,\*</sup>

<sup>1</sup>Department of Environmental Health, Graduate School of Public Health, Seoul National University, 1 Gwanak, Gwanak-ro, Gwanak-gu, Seoul 151-742, South Korea

<sup>2</sup>Institute of Health and Environment, Seoul National University, 1 Gwanak, Gwanak-ro, Gwanak-gu, Seoul 151-742, South Korea

<sup>3</sup>Department of Civil and Environmental Engineering, Clarkson University, Potsdam, NY13699, USA

<sup>4</sup>Department of Environmental Science, Kangwon National University, 192-1, Hyoja-2-dong, Chuncheon, Kangwondo, 200-701, South Korea

<sup>5</sup>Asian Institute for Energy, Environment & Sustainability, Seoul National University, 1 Gwanak-ro, Gwanak-gu, Seoul 151-742, South Korea

<sup>6</sup>Department of Environmental, Civil and Transportation Engineering, Ajou University, Woncheon-dong, Yeongtong-gu, Suwon, 443-749, South Korea

<sup>7</sup>Division of Air Pollution Engineering, Department of Climate and Air Quality Research, National Institute of Environmental Research, Hwangryong-ro 42, Seogu, Incheon, 404-708, South Korea

<sup>8</sup>University of Pennsylvania, Philadelphia, PA19104, USA

\* Address correspondence to Dr. Seung-Muk Yi, Graduate School of Public Health, Seoul National University, 1 Gwanak, Gwanak-ro, Gwanak-gu, Seoul 151-742, South Korea  
E-mail) yiseung@snu.ac.kr  
Telephone) 82-2-880-2736  
Fax) 82-2-745-9104



## Abstract

Total gaseous mercury (TGM) concentrations were measured every 5 min in Pohang, Gyeongsangbuk-do, Korea during summer (17 August~23 August 2012), fall (9 October~17 October 2012), winter (22 January ~29 January 2013), and spring (26 March~3 April 2013) to: 1) characterize the hourly and seasonal variations of atmospheric TGM concentrations, 2) identify the relationships between TGM and co-pollutants, and 3) identify likely source directions and locations of TGM using conditional probability function (CPF), conditional bivariate probability function (CBPF) and total potential source contribution function (TPSCF).

The TGM concentration was statistically significantly highest in fall ( $6.7 \pm 6.4 \text{ ng m}^{-3}$ ), followed by spring ( $4.8 \pm 4.0 \text{ ng m}^{-3}$ ), winter ( $4.5 \pm 3.2 \text{ ng m}^{-3}$ ) and summer ( $3.8 \pm 3.9 \text{ ng m}^{-3}$ ). There was a weak but statistically significant negative correlation between the TGM concentration and ambient air temperature ( $r = -0.08$ ) ( $p < 0.05$ ). Although the daytime temperature ( $14.7 \pm 10.0 \text{ }^{\circ}\text{C}$ ) was statistically significantly higher than that in the nighttime ( $13.0 \pm 9.8 \text{ }^{\circ}\text{C}$ ) ( $p < 0.05$ ), the daytime TGM concentration ( $5.3 \pm 4.7 \text{ ng m}^{-3}$ ) was statistically significantly higher than those in the nighttime ( $4.7 \pm 4.7 \text{ ng m}^{-3}$ ) ( $p < 0.01$ ), possibly due to local emissions related to industrial activities and activation of local surface emission sources. The observed  $\Delta\text{TGM}/\Delta\text{CO}$  was significantly lower than that of Asian long-range transport, but similar to that of local sources in Korea and in US industrial events suggesting that local sources are more important than that of long-range transport. CPF, CBPF and TPSCF indicated that the main sources of TGM were iron and manufacturing facilities, the hazardous waste incinerators and the coastal areas.

67    **Keywords:** Total gaseous mercury (TGM); co-pollutant; conditional probability function  
68    (CPF); conditional bivariate probability function (CBPF); total potential source contribution  
69    function (TPSCF)

## 1. Introduction

Mercury (Hg) in the atmosphere exists in three major inorganic forms including gaseous elemental mercury (GEM,  $\text{Hg}^0$ ), gaseous oxidized mercury (GOM,  $\text{Hg}^{2+}$ ) and particulate bound mercury (PBM,  $\text{Hg(p)}$ ). GEM which is the dominant form of Hg in ambient air, (>95%) has a relatively long residence time (0.5~2 years) due to its low reactivity and solubility Schroeder and Munthe (1998). However, GOM has high water solubility and relatively strong surface adhesion properties (Han et al., 2005), so it has a short atmospheric residence time (~days). PBM is associated with airborne particles such as dust, soot, sea-salt aerosols, and ice crystals (Lu and Schroeder, 2004) and is likely produced, in part, by adsorption of GOM species such as  $\text{HgCl}_2$  onto atmospheric particles (Gauchard et al., 2005; Lu and Schroeder, 2004; Sakata and Marumoto, 2005; Seo et al., 2015).

Atmospheric Hg is emitted from both natural sources (volcanoes, volatilization from aquatic and terrestrial environments) and anthropogenic sources (coal combustion, ferrous and non-ferrous metals manufacturing facilities, waste incineration and industrial boilers) (Lindberg et al., 2007; Pirrone et al., 2010; Schmeltz et al., 2011).

Atmospheric Hg released from natural and anthropogenic sources when introduced into terrestrial and aquatic ecosystem through wet and dry deposition (Mason and Sheu, 2002) can undergo various physical and chemical transformations before being deposited. Its lifetime in the atmosphere depends on its reactivity and solubility so that depending on its form it can have impacts on local, regional and global scales (Lin and Pehkonen, 1999; Lindberg et al., 2007). A portion of the Hg deposited in terrestrial environments through direct industrial discharge or atmospheric deposition is transported to aquatic system through groundwater and surface water runoff (Miller et al., 2013).

A previous study also reported that Hg directly released into terrestrial and aquatic ecosystems from industrial effluent has influenced surface water, sediment and biological tissue (Flanders et al., 2010).

Significant spatial variations in atmospheric Hg deposition near urban and industrial areas were due to local anthropogenic sources including municipal waste incinerators, medical waste incinerators, electric power generating facilities and cement kilns (Dvonch et al., 1998), ferrous and non-ferrous metal processing, iron and steel manufacturing facilities, and oil and coal combustion (Hoyer et al., 1995). Miller et al. (2013) also reported that local sources of elemental Hg are typically industrial processes including retort facilities used in the mercury mining industry to convert Hg containing minerals to elemental Hg and chlor-alkali facilities.

Annual anthropogenic Hg emissions in South Korea have been estimated to be 12.8 tons; the major anthropogenic mercury emission sources are coal combustion in thermal power plants (25.8%), oil refineries (25.5%), cement kilns (21%), incinerators (19.3%) including sludge incinerators (4.7%), municipal waste incinerators (MWIs) (3%), industrial waste incinerators (IWI) (2.7%), hospital/medical/infectious waste incinerators (HMIWIs) (8.8%), and iron manufacturing (7%) (Kim et al., 2010).

Receptor models are often used to identify sources of air pollutants and are focused on the pollutants behavior in the ambient environment at the point of impact (Hopke, 2003). In previous studies, conditional probability function (CPF), which utilizes the local wind direction, and potential source contribution function (PSCF), which utilizes longer backward trajectories (typically 3-5 days), combined with concentration data were used to identify possible transport pathways and source locations (Hopke, 2003). While PSCF has been used

primarily to identify regional sources, it has also been used to identify local sources (Hsu et al., 2003). The objectives of this study were to characterize the hourly and seasonal variations of atmospheric TGM (the sum of the GEM and the GOM) concentrations, to identify the relationships between TGM and co-pollutant concentrations, and to identify likely source directions and locations of TGM using CPF, conditional bivariate probability function (CBPF) and total PSCF (TPSCF).

## 2. Materials and methods

### 2.1. Sampling and analysis

TGM concentrations were measured on the roof of the Korean Federation of Community Credit Cooperatives (KFCCC) building (latitude: 35.992°, longitude: 129.404°, ~10 m above ground) in Pohang city, in Gyeongsangbuk-do, a province in eastern South Korea. Gyeongsangbuk-do has a population of 2.7 million (5% of the total population and the third most populated province in South Korea) and an area of 19,030 km<sup>2</sup> (19% of the total area of South Korea and the largest province geographically in South Korea). Pohang city has a population of 500,000 (1% of the total population in South Korea) and an area of 605.4 km<sup>2</sup> (1.1% of the total area in South Korea). It is heavily industrialized with the third largest steel manufacturing facility in Asia and the fifth largest in the world. There are several iron and steel manufacturing facilities including electric and sintering furnaces using coking in Gyeongsangbuk-do including Pohang. In addition, there are several coke plants around the sampling site. The Hyungsan River divides the city into a residential area and the steel complex. [Hg emissions data from iron and steel manufacturing, and a hazardous waste incinerator were estimated based on a previous study](#) (Kim et al., 2010) ([Fig. 1](#)).

TGM concentrations were measured every 5 min during summer (17 August~23 August 2012), fall (9 October~17 October 2012), winter (22 January ~29 January 2013), and spring (26 March~3 April 2013) using a mercury vapor analyzer (Tekran 2537B) which has two gold cartridges that alternately collect and thermally desorb mercury. Ambient air at a flow rate of  $1.5 \text{ L min}^{-1}$  was transported through a 3 m-long heated sampling line (1/4" OD Teflon) in to the analyzer. The sampling line was heated at about 50 °C using heat tape to prevent water condensation in the gold traps because moisture on gold surfaces interferes with the amalgamation of Hg (Keeler and Barres, 1999). Particulate matter was removed from the sampling line by a 47 mm Teflon filter.

## 2.2. Meteorological data

Hourly meteorological data (air temperature, relative humidity, and wind speed and direction) were obtained from the Automatic Weather Station (AWS) operated by the Korea Meteorological Administration (KMA) (<http://www.kma.go.kr>) (6 km from the site). Hourly concentrations of NO<sub>2</sub>, O<sub>3</sub>, CO, PM<sub>10</sub> and SO<sub>2</sub> were obtained from the National Air Quality Monitoring Network (NAQMN) (3 km from the site) (Fig. 1).

## 2.3. QA/QC

Automated daily calibrations were carried out for the Tekran 2537B using an internal permeation source. Two-point calibrations (zero and span) were separately performed for each gold cartridge. Manual injections were performed prior to every field sampling campaign to evaluate these automated calibrations using a saturated mercury vapor standard. The relative percent difference (RPD) between automated calibrations and manual injections was less than 2%. The recovery measured by directly injecting known amounts of four

mercury vapor standards when the sample line was connected to zero air ranged from 92 to 110% ( $99.4 \pm 5.2\%$  in average).

### 3. Model descriptions

#### 3.1. Conditional Probability Function (CPF)

CPF was originally performed to determine which wind directions dominate during high concentration events to evaluate local source impacts (Ashbaugh et al., 1985). It has been successfully used in many previous studies (Begum et al., 2004; Kim et al., 2003a; Kim et al., 2003b; Xie and Berkowitz, 2006; Zhao et al., 2004; Zhou et al., 2004). CPF estimates the probability that the measured concentration will exceed the threshold criterion for a given wind direction. The CPF is defined as follows Eq. (1).

$$CPF_{\Delta\theta} = \frac{m_{\Delta\theta|C \geq x}}{n_{\Delta\theta}} \quad (1)$$

where,  $m_{\Delta\theta}$  is the number of samples from the wind sector  $\theta$  having concentration  $C$  greater than or equal to a threshold value  $x$ , and  $n_{\Delta\theta}$  is the total number of samples from wind sector  $\Delta\theta$ . In this study, 16 sectors ( $\Delta\theta = 22.5^\circ$ ) were used and calm winds ( $\leq 1 \text{ m s}^{-1}$ ) were excluded from the analysis. The threshold criterion was set at above the overall average TGM concentration ( $5.0 \text{ ng m}^{-3}$ ). Thus, CPF indicates the potential for winds from a specific direction to contribute to high air pollution concentrations.

#### 3.2. Conditional Bivariate Probability Function (CBPF)

CBPF couples ordinary CPF with wind speed as a third variable, allocating the measured concentration of pollutant to cells defined by ranges of wind direction and wind speed rather than to only wind direction sectors.

The CBPF is defined as follows Eq. (2).

$$CBPF_{\Delta\theta,\Delta u} = \frac{m_{\Delta\theta,\Delta u}|_{C \geq x}}{n_{\Delta\theta,\Delta u}} \quad (2)$$

where,  $m_{\Delta\theta,\Delta u}$  is the number of samples in the wind sector  $\Delta\theta$  with wind speed interval  $\Delta u$  having concentration  $C$  greater than a threshold value  $x$ , and  $n_{\Delta\theta,\Delta u}$  is the total number of samples in that wind direction-speed interval. The threshold criterion was set at above the overall average TGM concentration ( $5.0 \text{ ng m}^{-3}$ ). The extension to the bivariate case can provide more information on the nature of the sources because different source types such as stack emission sources and ground-level sources can have different wind speed dependencies (prominent at low and high wind speed). More detailed information is described in a previous study (Uria-Tellaetxe and Carslaw, 2014).

### 3.3. Potential Source Contribution Function (PSCF)

The PSCF model has been extensively and successfully used in the previous studies to identify the likely source areas (Cheng et al., 1993; Han et al., 2004; Hopke et al., 2005; Lai et al., 2007; Lim et al., 2001; Poissant, 1999; Zeng and Hopke, 1989). The PSCF is a simple method that links residence time in upwind areas with high concentrations through a conditional probability field and was originally developed by Ashbaugh et al. (1985).  $PSCF_{ij}$  is the conditional probability that an air parcel that passed through the  $ij$ th cell had a high concentration upon arrival at the monitoring site and is defined as the following Eq. (3).



209

210

$$PSCF_{ij} = \frac{m_{ij}}{n_{ij}} \quad (3)$$

211

212

where,  $n_{ij}$  is the number of trajectory segment endpoints that fall into the  $ij$ -th cell, and  $m_{ij}$  is the

213

number of segment endpoints in the same grid cell ( $ij$ -th cell) when the concentrations are higher

214

than a criterion value as measured at the sampling site.

215

High PSCF values in those grid cells are regarded as possible source locations. Cells including

216

emission sources can be identified with conditional probabilities close to one if trajectories that

217

have crossed the cells efficiently transport the released pollutant to the receptor site. Therefore,

218

the PSCF model provides a tool to map the source potentials of geographical areas.

219

The criterion value of PSCF for TGM concentration was set at above the overall average

220

concentration ( $5.0 \text{ ng m}^{-3}$ ) to identify the emission sources associated with high TGM

221

concentrations and provide a better estimation and resolution of source locations during the

222

sampling periods. The geographic area covered by the computed trajectories was divided into

223

an array of  $0.05^\circ$  latitude by  $0.05^\circ$  longitude grid cells. As will be discussed in Section 5.4, 24

224

h backward trajectories starting at every hour at a height of 10, 50, and 100 m above ground

225

level were computed using the vertical velocity model because local sources are more

226

important than that of long-range transport in this study (It should be noted that PSCF results

227

using 48 h backward trajectories had similar results as the 24 h backward trajectories). Each

228

trajectory was terminated if they exit the model top (5,000m), but advection continues along

229

the surface if trajectories intersect the ground. To generate horizontally highly resolved

230

meteorological inputs for trajectory calculations, the Weather Research and Forecast (WRF)

231

model was used to generate a coarse domain at a resolution of 27 km and a nested domain at

232

a horizontal resolution of 9 km, which geographically covers northeast Asia and the southern

part of the Korean Peninsula, respectively. The nested domain has 174 columns in the east-west direction and 114 rows in the north-south direction. PSCF was calculated with 9 km meteorological data.

In this study, TPSCF which incorporates probability from above different starting heights was calculated since backward trajectories starting at different heights traverse different distances and pathways, thus providing information that cannot be obtained from a single starting height (Cheng et al., 1993).

Generally, PSCF results show that the potential sources covered wide areas instead of indicating individual sources due to the trailing effect. The trailing effect appears since PSCF distributes a constant weight along the path of the trajectories. To minimize the effect of small  $n_{ij}$  (the number of trajectory segment endpoints that fall into the  $ij$ -th cell) values, resulting in high TPSCF values with high uncertainties, an arbitrary weight function  $W(n_{ij})$  was applied to down-weight the PSCF values for the cell in which the total number of end points was less than three times the average value of the end points (Choi et al., 2011; Heo et al., 2009; Hopke et al., 1995; Polissar et al., 2001). The TPSCF value for a grid cell was defined with following Eq. (4).

$$P(TPSCF_{ij}) = \frac{P(m_{ij})_{10m} + P(m_{ij})_{50m} + P(m_{ij})_{100m}}{P(n_{ij})_{10m} + P(n_{ij})_{50m} + P(n_{ij})_{100m}} \times W \quad (4)$$

where,

$$W(n_{ij}) = \begin{cases} 1.0, & 3n_{ave} < n_{ij} \\ 0.8, & 2n_{ave} < n_{ij} \leq 3n_{ave} \\ 0.6, & n_{ave} < n_{ij} \leq 2n_{ave} \\ 0.4, & 0.5n_{ave} < n_{ij} \leq n_{ave} \\ 0.2, & n_{ij} \leq 0.5n_{ave} \end{cases}$$

#### 4. Clean Air Policy Support System (CAPSS) data

In this study, the Korean National Emission Inventory estimated using Clean Air Policy Support System (CAPSS) data developed by the National Institute of Environmental Research (NIER) were used (<http://airemiss.nier.go.kr/main.jsp> (accessed December 09, 2015)). The CAPSS is the national emission inventory system for the air pollutants (CO, NO<sub>x</sub>, SO<sub>x</sub>, TSP, PM<sub>10</sub>, PM<sub>2.5</sub>, VOCs and NH<sub>3</sub>) which utilizes various national, regional and local statistical data collected from about 150 organizations in Korea. In CAPSS, the Source Classification Category (SCC) excluding fugitive dust and biomass burning based on the European Environment Agency's (EEA) CORE Inventory of AIR emissions was classified into the following four levels (EMEP/CORINAIR) (NIER, 2011).

- (1) The upper level (SCC1): 11 source categories ,
- (2) The intermediate level (SCC2): 42 source categories and
- (3) The lower level (SCC3): 173 source categories

The sectoral contributions of emissions of South Korea, Gyeongsangbuk-do and Pohang for CO, NO<sub>x</sub>, SO<sub>x</sub>, TSP, PM<sub>10</sub>, PM<sub>2.5</sub>, VOC and NH<sub>3</sub> are shown in **Fig. S1** (See SI for details).

More detailed information about SCCs in CAPSS is described in Table S1.

## 5. Results and Discussions

### 5.1. Meteorological data analysis

**Fig. S2** shows the frequency of counts of measured wind direction occurrence by season during the sampling period. The predominant wind direction at the sampling site was W (20.9%) and WS (19.2%), and calm conditions of wind speed less than  $1 \text{ m s}^{-1}$  occurred 7.6% of the time. Compared to other seasons, however, the prevailing winds in summer were N (17.0%), NE (16.4%), S (16.4%), and SW (15.8%).

### 5.2. General characteristics of TGM

The seasonal distributions of TGM were characterized by large variability during each sampling period (**Fig. 2**). The average concentration of TGM during the complete sampling period was  $5.0 \pm 4.7 \text{ ng m}^{-3}$  (range:  $1.0\text{--}79.6 \text{ ng m}^{-3}$ ). This is significantly higher than the Northern Hemisphere background concentration ( $\sim 1.5 \text{ ng m}^{-3}$ ) (Sprovieri et al., 2010) and those measured in China, in Japan and other locations in Korea, however considerably lower than those measured near large Hg sources in Guangzhou, China (Table 1). The median TGM concentration was  $3.6 \text{ ng m}^{-3}$  which was much lower than that of the average, suggesting that there were some extreme pollution episodes with very high TGM concentrations.

The TGM concentration follows a typical log-normal distribution (**Fig. S3**). The range of 2 to  $5 \text{ ng m}^{-3}$  dominated the distribution, accounting for more than half of the total number of samples (60.8%). The maximum frequency of 28.1% occurred between 2 and  $3 \text{ ng m}^{-3}$ . Extremely high TGM concentration events ( $>20 \text{ ng m}^{-3}$ ) were also observed (1.7% of the time).

### 5.3. Seasonal variations

The TGM concentration was statistically significantly higher in fall ( $6.7 \pm 6.4 \text{ ng m}^{-3}$ ) ( $p < 0.01$ ), followed by spring ( $4.8 \pm 4.0 \text{ ng m}^{-3}$ ), winter ( $4.5 \pm 3.2 \text{ ng m}^{-3}$ ) and summer ( $3.8 \pm 3.9 \text{ ng m}^{-3}$ ) (Table 2). The highest concentrations ( $\text{TGM} > 10 \text{ ng m}^{-3}$ ) were measured more frequently in fall (24.7%), and the lowest concentrations ( $\text{TGM} < 3 \text{ ng m}^{-3}$ ) mainly occurred in summer (49.7%). The low TGM concentration in summer is likely because increased mixing height (Friedli et al., 2011), and gas phase oxidation (Choi et al., 2013; Huang et al., 2010; Lynam and Keeler, 2006) at higher temperatures particularly at this sampling site which is close to the ocean (2 km) where oxidation involving halogens may be enhanced (Holmes et al., 2009; Lin et al., 2006). The high TGM concentrations in fall was due to different wind direction (see Fig. S2), sources, relationships with other pollutants and meteorological conditions. More detailed information can be found in Section 5.5.

The average concentrations of  $\text{NO}_2$ ,  $\text{O}_3$ , CO,  $\text{PM}_{10}$  and  $\text{SO}_2$  during the complete sampling period were  $23.1 \pm 10.8 \text{ ppbv}$ ,  $24.6 \pm 12.5 \text{ ppbv}$ ,  $673.7 \pm 487.3 \text{ ppbv}$ ,  $55.5 \pm 26.4 \text{ } \mu\text{g m}^{-3}$  and  $6.7 \pm 4.3 \text{ ppbv}$ , respectively.  $\text{NO}_2$ ,  $\text{O}_3$ , CO,  $\text{PM}_{10}$  and  $\text{SO}_2$  concentrations were highest in spring (Table 2). There was a statistically significant positive correlation between the TGM and  $\text{PM}_{10}$  ( $r = 0.10$ ) ( $p < 0.01$ ). However, the TGM concentration was not significantly correlated with  $\text{NO}_2$ , CO or  $\text{SO}_2$  concentrations, suggesting that combustion associated with space heating was not a significant source of TGM (Choi et al., 2009).

### 5.4. Relationship between TGM and CO

CO has a significant anthropogenic source and is considered to be an indicator of anthropogenic emissions (Mao et al., 2008). Previous studies reported that TGM and CO

have a strong correlation because they have similar emission sources (combustion processes) and similar long atmospheric residence times (Weiss-Penzias et al., 2003).

There was a weak positive correlation between TGM and CO in this study ( $r = 0.04$ ) ( $p = 0.27$ ). However there was a statistically significant correlation between TGM and CO in winter ( $r = 0.25$ ) ( $p < 0.05$ ), suggesting that TGM and CO were affected by similar, possibly distant, anthropogenic emission sources in winter.

On the other hand, there were no statistically significant correlations between TGM and CO in spring ( $r = 0.02$ ) ( $p = 0.78$ ), in summer ( $r = 0.13$ ) ( $p = 0.08$ ), or in fall ( $r = -0.03$ ) ( $p = 0.69$ ), indicating that TGM and CO were affected by different anthropogenic emission sources in these seasons.

Previous studies identified the long-range transport of mercury using the  $\Delta\text{TGM}/\Delta\text{CO}$  enhancement ratio (Choi et al., 2009; Jaffe et al., 2005; Kim et al., 2009; Weiss-Penzias et al., 2003; Weiss-Penzias et al., 2006). Kim et al. (2009) and Choi et al. (2009) investigated high concentration events which were defined as at least a 10 h period with hourly average TGM and CO concentrations higher than the average monthly TGM and CO concentrations. They reported that long-range transport events were characterized by high values of TGM/CO ratio ( $\Delta\text{TGM}/\Delta\text{CO}$ ) ( $0.0052\text{--}0.0158 \text{ ng m}^{-3} \text{ ppb}^{-1}$ ) and high correlations ( $r^2 > 0.5$ ), whereas local events showed low  $\Delta\text{TGM}/\Delta\text{CO}$  ( $0.0005 \text{ ng m}^{-3} \text{ ppb}^{-1}$  in average) and weak correlations ( $r^2 < 0.5$ ).

The observed  $\Delta\text{TGM}/\Delta\text{CO}$  was  $0.0001 \text{ ng m}^{-3} \text{ ppb}^{-1}$  in spring,  $0.0005 \text{ ng m}^{-3} \text{ ppb}^{-1}$  in summer,  $-0.0007 \text{ ng m}^{-3} \text{ ppb}^{-1}$  in fall,  $0.0011 \text{ ng m}^{-3} \text{ ppb}^{-1}$  in winter, which are significantly lower than that indicative of Asian long-range transport ( $0.0046\text{--}0.0056 \text{ ng m}^{-3} \text{ ppb}^{-1}$ ) (Friedli

et al., 2004; Jaffe et al., 2005; Weiss-Penzias et al., 2006), suggesting that local sources are more important than that of long-range transport in this study. The  $\Delta\text{TGM}/\Delta\text{CO}$  in winter ( $0.0011 \text{ ng m}^{-3} \text{ ppb}^{-1}$ ) was similar to that of a site impacted by local sources in Korea (Kim et al., 2009) and in US industrially related events ( $0.0011 \text{ ng m}^{-3} \text{ ppb}^{-1}$ ) (Weiss-Penzias et al., 2007).

There are also uncertainties from the potential mixing between Hg associated with long-range transported airflows and local air making it difficult to distinguish between distant and local source impacts. However, it is possible that the one-week sampling period in each season did not capture the long-range transport events, and more can be learned using a larger dataset than just using the one-week sampling period to confirm these results.

### 5.5. Diurnal variations

Diurnal variations of TGM (Fig. 3), co-pollutants concentrations, and meteorological data were observed (Fig. S4). TGM,  $\text{O}_3$ , CO,  $\text{SO}_2$ , and temperature in the daytime (06:00-18:00) were higher than those in the nighttime (18:00-06:00) ( $p < 0.05$ ) except  $\text{PM}_{10}$  ( $p = 0.09$ ) (Fig. S5). However,  $\text{NO}_2$  during the nighttime because of relatively lower photochemical reactivity with  $\text{O}_3$  was higher than that in daytime ( $p < 0.05$ ) (Adame et al., 2012). TGM generally showed a consistent diurnal variation with an increase in the early morning (06:00-09:00) and a decrease in the afternoon (14:00-17:00), similar to previous studies (Dommergue et al., 2002; Friedli et al., 2011; Li et al., 2011; Liu et al., 2011; Mao et al., 2008; Shon et al., 2005; Song et al., 2009; Stamenkovic et al., 2007).

The daytime TGM concentration ( $5.3 \pm 4.7 \text{ ng m}^{-3}$ ) was higher than that in the nighttime ( $4.7 \pm 4.7 \text{ ng m}^{-3}$ ) ( $p < 0.01$ ), which was similar to several previous studies (Cheng et al., 2014; Gabriel et al., 2005; Nakagawa, 1995; Stamenkovic et al., 2007) but different than

another studies (Lee et al., 1998). Previous studies reported that this different is due to local sources close to the sampling site (Cheng et al., 2014; Gabriel et al., 2005), a positive correlation between TGM concentration and ambient air temperature (Nakagawa, 1995) and increased traffic (Stamenkovic et al., 2007). However, another study suggested that the higher TGM concentration during the night was due to the shallowing of the boundary layer, which concentrated the TGM near the surface (Lee et al., 1998).

In a previous study the daytime TGM concentration was relatively lower than that in the nighttime because the sea breeze transported air containing low amounts of TGM from the ocean during the daytime whereas the land breeze transported air containing relatively high concentrations of TGM from an urban area during the nighttime (Kellerhals et al., 2003).

Although it is possible that the land-sea breeze may affect diurnal variations in TGM concentrations since the sampling site was near the ocean and lower TGM were also observed during the daytime, the higher concentrations in the daytime than those in nighttime were due to local emission sources because the daytime temperature ( $14.7 \pm 10.0$  °C) was statistically significantly higher than that in the nighttime ( $13.0 \pm 9.8$  °C) (t-test,  $p < 0.05$ ) and there was a weak but statistically significant negative correlation between TGM concentration and ambient air temperature ( $r = -0.08$ ) ( $p < 0.05$ ). In addition, there are several known Hg sources such as iron and steel manufacturing facilities including electric and sintering furnaces using coking between the sampling site and the ocean.

As shown in Fig. 3 and Fig. S4, there was a weak but negative relationship between the TGM concentrations and O<sub>3</sub> concentrations ( $r = -0.18$ ) ( $p < 0.01$ ), suggesting that oxidation of GEM in the oxidizing atmosphere during periods of strong atmospheric mixing was partially responsible for the diurnal variations of TGM concentrations. In addition, oxidation of GEM by bromine species in the coastal area (Obrist et al., 2011) or by chloride radicals in



marine boundary layer (Laurier et al., 2003) might play a significant role. If oxidation of GEM occurred, GOM concentrations would increase. However there are uncertainties on the net effects on TGM (the sum of the GEM and the GOM) since we did not measure GOM concentrations.

Significantly different diurnal patterns have been observed at many suburban sites with the daily maximum occurring in the afternoon (12:00-15:00), possibly due to local emission sources and transport (Fu et al., 2010; Fu et al., 2008; Kuo et al., 2006; Wan et al., 2009). Other studies in Europe reported that TGM concentrations were relatively higher early in the morning or at night possibly due to mercury emissions from surface sources that accumulated in the nocturnal inversion layer (Lee et al., 1998; Schmolke et al., 1999).

TGM concentration was negatively correlated with ambient air temperature ( $r = -0.08$ ) ( $p < 0.05$ ) because high ambient air temperature in the daytime will increase the height of the boundary layer and dilute the TGM, and the relatively lower boundary layer at nighttime could concentrate the TGM in the atmosphere (Li et al., 2011). Although there was a statistically significant negative correlation between the TGM concentration and ambient air temperature, there was a rapid increase in TGM concentration between 06:00-09:00 when ambient temperatures also increased possibly due to local emissions related to industrial activities, increased traffic, and activation of local surface emission sources. Similar patterns were found in previous studies (Li et al., 2011; Stamenkovic et al., 2007). Nonparametric correlations revealed that there is a positive correlation between TGM and ambient air temperature ( $r_s = 0.11$ ,  $p=0.27$ ) between 06:00-09:00. The TGM concentration was negatively correlated with  $O_3$  ( $r_s = -0.33$ ,  $p<0.01$ ) but positively correlated with  $NO_2$  ( $r_s = 0.21$ ,  $p<0.05$ ), suggesting that the increased traffic is the main source of TGM during these time periods.

Compared to other seasons, significantly different diurnal variations of TGM were observed in fall. The daytime TGM concentrations in fall were similar to those in other seasons, however, the nighttime TGM concentrations in fall were much higher than other seasons. As described earlier in Section 5.3, the high TGM concentrations in fall was possibly due to the relationship between other pollutants and meteorological conditions as well as different wind direction and sources. The nighttime TGM concentrations in fall were simultaneously positively correlated with  $PM_{10}$  ( $r=0.26$ ) ( $p<0.05$ ) and CO ( $r=0.21$ ) ( $p<0.05$ ) concentrations and wind speed ( $r=0.35$ ) ( $p<0.01$ ), suggesting that the combustion process is an important source during this period.

Based on the above results, the diurnal variations in TGM concentration are due to a combination of: 1) reactions with an oxidizing atmosphere, 2) changes in ambient temperature and 3) local emissions related to industrial activities. To supplement these conclusions CPF and CBPF were used to identify source directions and TPSCF was used to identify potential source locations.

#### 5.6. CPF, CBPF and TPSCF results of TGM

Conventional CPF, CBPF and TPSCF plots for TGM concentrations higher than the average concentration show high source probabilities to the west in the direction of large steel manufacturing facilities and waste incinerators (Fig. 4). The CPF only shows high probabilities from the west and provides no further information, however, the CBPF shows groups of sources with the high probabilities from the west and the northeast. CBPF shows that the high probabilities from the west occurred under high wind speed ( $> 3 \text{ m s}^{-1}$ ) indicative of emissions from stacks as well as low wind speed ( $\leq 3 \text{ m s}^{-1}$ ) indicative of non-buoyant ground level sources (Uria-Tellaetxe and Carslaw, 2014).

As described in Section 5.4, correlations between TGM and CO revealed that TGM and CO were affected by similar anthropogenic emission sources in winter but affected by different sources in spring, summer and fall, which is supported by Fig. S6 which shows significantly different seasonal patterns of CPF and CBPF for TGM concentrations.

It is difficult to discuss about the different seasonal patterns of CPF and CBPF for TGM concentrations since there were no correlations between TGM and other pollutants in spring, summer and fall. However, compared to Fig. 4, the CPF and CBPF patterns in fall were similar to those during the whole sampling periods. Especially, the nighttime TGM concentration in fall was simultaneously positively correlated with PM<sub>10</sub> ( $r=0.26$ ) ( $p<0.05$ ) and CO ( $r=0.21$ ) ( $p<0.05$ ) concentrations and wind speed ( $r=0.35$ ) ( $p<0.01$ ), indicating that the combustion process from the west is an important source during this period.

Since TGM showed a significant correlation with CO ( $r=0.25$ ) ( $p<0.05$ ) and showed a weak positive correlation with PM<sub>10</sub> ( $r=0.08$ ) ( $p=0.33$ ) in winter, the combustion source from the west is partially responsible for this result with high wind speed.

TPSCF identified the likely sources of TGM as the iron and manufacturing facilities and the hazardous waste incinerators which are located to the west from the sampling site. A previous study reported that the waste incinerators (9%) and iron and steel manufacturing (7%) were relatively high Hg emissions sources in Korea (Kim et al., 2010). Waste incinerators emissions were due to the high Hg content in the waste (Lee et al., 2004). Emissions from iron and steel manufacturing are due to the numerous electric and sintering furnaces using coking which emits relatively high mercury concentrations (Lee et al., 2004) in Gyeongsangbuk-do including Pohang. There are several coke plants around the sampling site ([http://www.poscoenc.com/upload/W/BUSINESS/PDF/ENG\\_PLANT\\_2\\_1\\_3\\_5.pdf](http://www.poscoenc.com/upload/W/BUSINESS/PDF/ENG_PLANT_2_1_3_5.pdf) (accessed December 09, 2015)). They are essential parts of the iron and steel manufacturing,

and the major source of atmospheric mercury related to the iron and steel manufacturing is from coke production (Pacyna et al., 2006).

The coastal areas east of the sampling site where there are large ports were also identified as the likely source areas of TGM. A previous study reported that the emissions of gaseous and particulate pollutants were high during vehicular operations in port areas and from marine vessel and launches (Gupta et al., 2002). Another possibility is that significant amount of GEM are emitted from the ocean surface because of photo-chemically and microbiologically mediated photo-reduction of dissolved GOM (Amyot et al., 1994; Zhang and Lindberg, 2001). The northeast direction including the East Sea was also identified as potential source areas likely because this is an area with lots of domestic passenger ships routes. The south from the sampling was also identified as a likely source area of TGM where Ulsan Metropolitan City, South Korea's seventh largest metropolis with a population of over 1.1 million is located. It includes a large petrochemical complex known as a TGM source (Jen et al., 2013).

## Conclusions

During the sampling periods, the average TGM concentration was higher than the Northern Hemisphere background concentration, however, considerably lower than those near industrial areas in China and higher than those in Japan and other locations in Korea. The median concentration of TGM was much lower than that of the average, suggesting that there were some extreme pollution episodes with very high TGM concentrations. The TGM concentration was highest in fall, followed by spring, winter and summer. The high TGM concentration in fall is due to transport from different wind directions than during the other periods. The low TGM concentration in summer is likely due to increased mixing height and gas phase oxidation at higher temperatures particularly at this sampling site which is close to the ocean (2 km) where oxidation involving halogens may be enhanced.

TGM consistently showed a diurnal variation with a maximum in the early morning (06:00-09:00) and minimum in the afternoon (14:00-17:00). Although there was a statistically significant negative correlation between the TGM concentration and ambient air temperature, the daytime TGM concentration was higher than those in the nighttime, suggesting that local emission sources are important. There was a negative relationship between the TGM concentrations and O<sub>3</sub> concentrations, indicating that the oxidation was partially responsible for the diurnal variations of TGM concentrations. The observed  $\Delta\text{TGM}/\Delta\text{CO}$  was significantly lower than that indicative of Asian long-range transport, suggesting that local sources are more important than that of long-range transport. CPF only shows high probabilities to the west from the sampling site where there are large steel manufacturing facilities and waste incinerators. However, CBPF and TPSCF indicated that the dominant sources of TGM were the hazardous waste incinerators and the coastal areas in the northeast

as well as the iron and manufacturing facilities in the west. The domestic passenger ships routes in the East Sea were also identified as possible source areas.

### **Author contribution**

Yong-Seok Seo conducted a design of the study, the experiments and analysis of data, wrote the initial manuscript, and finally approved the final manuscript. Seung-Pyo Jeong, Eun Ha Park, Tae Young Kim, Hee-Sang Eum, Dae Gun Park, Eunhye Kim, Jaewon Choi and Jeong-Hun Kim conducted the experiments, analysis of data, and finally approved the final manuscript. Thomas M. Holsen, Young-Ji Han and Eunhwa Choi and Soontae Kim conducted interpretation of the results, revision of the initial manuscript, and finally approved the final manuscript. Seung-Muk Yi conducted a design of the study, acquisition of data of the study, interpretation of data, and revision of the initial manuscript, and finally approved the final manuscript.

### **Acknowledgments**

We thank National Institute of Environmental Research (NIER) for providing CAPSS data. This work was supported by Brain Korea 21 (BK21) Plus Project (Center for Healthy Environment Education and Research) through the National Research Foundation (NRF) of Korea and Korea Ministry of Environment (MOE) as “the Environmental Health Action Program”.

521 **Table List**

522 Table 1. Comparison with previous studies for TGM concentrations.

523 Table 2. Summary of atmospheric concentrations of TGM and co-pollutants, and  
524 meteorological data.

525

526 **Figure List**527 Fig. 1. The location of sampling site in this study ((a) South Korea, (b) Gyeongsangbuk-do  
528 and (c) Pohang).

529 Fig. 2. Time-series of TGM concentrations in this study.

530 Fig. 3. The diurnal variations of TGM concentrations during the sampling periods.

531 Fig. 4. CPF, CBPF and TPSCF plots for TGM higher than average concentration.

532 **Table 1.** Comparison with previous studies for TGM concentrations.

| Country | Location                            | Sampling period                                                                                                        | TGM conc.<br>(ng m <sup>-3</sup> ) | Classifications | Reference                  |
|---------|-------------------------------------|------------------------------------------------------------------------------------------------------------------------|------------------------------------|-----------------|----------------------------|
| China   | Mt. Waliguan, Qinghai–Tibet Plateau | Oct. 2007 ~ Sep. 2009                                                                                                  | 2.1                                | Remote          | Fu et al. (2015)           |
| China   | Mt. Hengduan, Qinghai–Tibet Plateau | Jul. 2010 ~ Oct. 2010                                                                                                  | 2.5                                | Remote          | Fu et al. (2015)           |
| China   | Nanjing, Jiangsu                    | Jan. 2011 ~ Oct. 2011                                                                                                  | 7.9                                | Urban           | Hall et al. (2014)         |
| China   | Mt. Dinghu, Guangdong               | Oct. 2009 ~ Apr. 2010                                                                                                  | 5.1                                | Rural           | Chen et al. (2013)         |
| China   | Guangzhou, Guangdong                | Nov. 2010 ~ Nov. 2011                                                                                                  | 4.6                                | Urban           | Chen et al. (2013)         |
| China   | Nanjing, Jiangsu                    | Jan. 2011 ~ Dec. 2011                                                                                                  | 7.9                                | Urban           | Zhu et al. (2012)          |
| China   | Guangzhou, Guangdong                | Jul. 1999 ~ Jul. 2000                                                                                                  | 13.5 - 25.4                        | Urban           | Fang et al. (2004)         |
| China   | Gui Yang, Guizhou                   | Jan. 2010 ~ Feb. 2010                                                                                                  | 8.4                                | Urban           | Feng et al. (2004)         |
| China   | Changchun, Jilin                    | Sep. 1999 ~ Aug. 2000                                                                                                  | 9.1-15.4                           | Suburban        | Fang et al. (2004)         |
| Japan   | Fukuoka                             | Jun. 2012 ~ May 2013                                                                                                   | 2.33                               | Urban           | (Marumoto et al., 2015)    |
| Japan   | Tokai-mura                          | Oct. 2005 ~ Aug. 2006                                                                                                  | 3.8                                | Suburban        | Osawa et al. (2007)        |
| Japan   | Tokyo                               | Apr. 2000 ~ Mar. 2001                                                                                                  | 2.7                                | Urban           | Sakata and Marumoto (2002) |
| Korea   | Seoul                               | 1987 ~ 2013                                                                                                            | 3.7                                | Urban           | Kim et al. (2016)          |
| Korea   | Gangwon-do, Chuncheon               | 2006 ~ 2009                                                                                                            | 2.1                                | Rural           | Han et al. (2014)          |
| Korea   | Seoul                               | Feb. 2005 ~ Feb. 2006                                                                                                  | 3.2                                | Urban           | Kim et al. (2009)          |
| Korea   | Seoul                               | Feb. 2005 ~ Dec. 2006                                                                                                  | 3.4                                | Urban           | Choi et al. (2009)         |
| Korea   | Seoul                               | 19 Sep. 1997 ~ 29 Sep. 1997<br>27 May. 1998 ~ 18 Jun. 1998                                                             | 3.6                                | Urban           | Kim and Kim (2001)         |
| Korea   | Gyeongsangbuk-do, Pohang            | 17 Aug. 2012 ~ 23 Aug. 2012<br>9 Oct. 2012 ~ 17 Oct. 2012<br>22 Jan. 2013 ~ 29 Jan. 2013<br>26 Mar. 2013 ~ 3 Apr. 2013 | 5.0                                | Urban           | This study                 |

533



**Table 2.** Summary of atmospheric concentrations of TGM and co-pollutants, and meteorological data. Note that TGM was measured every 5-min, and other pollutants and meteorological data were measured every 1-hour.

|        |         | TGM<br>(ng m <sup>-3</sup> ) | NO <sub>2</sub><br>(ppb) | O <sub>3</sub><br>(ppb) | CO<br>(ppb)   | PM <sub>10</sub><br>(µg m <sup>-3</sup> ) | SO <sub>2</sub><br>(ppb) | Temperature<br>(°C) | Wind speed<br>(m s <sup>-1</sup> ) | Humidity<br>(%) | Solar<br>radiation<br>(MJ m <sup>-2</sup> ) |
|--------|---------|------------------------------|--------------------------|-------------------------|---------------|-------------------------------------------|--------------------------|---------------------|------------------------------------|-----------------|---------------------------------------------|
| Spring | N       | 2139                         | 189                      | 215                     | 215           | 215                                       | 215                      | 216                 | 216                                | 216             | 216                                         |
|        | Average | 4.8 ± 4.0                    | 25.3 ± 9.0               | 29.4 ± 14.2             | 766.5 ± 505.2 | 70.1 ± 26.0                               | 7.6 ± 3.8                | 10.5 ± 4.2          | 2.2 ± 1.2                          | 56.2 ± 16.8     | 0.82 ± 1.09                                 |
|        | Range   | 1.9 – 45.3                   | 8 – 55                   | 2 – 58                  | 300 – 3100    | 28 - 204                                  | 5 - 35                   | 1.1 – 21.6          | 0.4 – 6.2                          | 19.0 – 94.0     | 0 – 3.44                                    |
| Summer | N       | 1863                         | 187                      | 188                     | 187           | 188                                       | 188                      | 186                 | 180                                | 186             | 141                                         |
|        | Average | 3.8 ± 3.9                    | 18.3 ± 9.2               | 18.9 ± 10.1             | 697.3 ± 689.7 | 35.1 ± 15.8                               | 6.5 ± 6.2                | 26.6 ± 4.2          | 2.2 ± 1.1                          | 82.5 ± 13.9     | 0.40 ± 0.69                                 |
|        | Range   | 1.2 – 75.9                   | 4 – 44                   | 5 – 48                  | 200 – 3300    | 12 – 87                                   | 2 - 27                   | 19.7 – 34.1         | 0.1 – 6.4                          | 43 - 98         | 0 – 2.92                                    |
| Fall   | N       | 2226                         | 212                      | 212                     | 212           | 212                                       | 211                      | 216                 | 216                                | 216             | 216                                         |
|        | Average | 6.7 ± 6.4                    | 25.0 ± 7.8               | 23.7 ± 13.1             | 662.7 ± 350.2 | 58.1 ± 17.8                               | 5.3 ± 3.5                | 17.4 ± 3.2          | 2.1 ± 0.8                          | 54.5 ± 14.7     | 0.62 ± 0.90                                 |
|        | Range   | 1.0 – 79.6                   | 9 – 53                   | 6 – 69                  | 300 – 2900    | 20 - 145                                  | 3 - 39                   | 11.7 – 25.2         | 0.5 – 4.5                          | 12 - 79         | 0 – 2.90                                    |
| Winter | N       | 1917                         | 188                      | 187                     | 188           | 188                                       | 186                      | 192                 | 192                                | 192             | 192                                         |
|        | Average | 4.5 ± 3.2                    | 23.5 ± 14.7              | 26.1 ± 8.7              | 556.4 ± 298.9 | 56.3 ± 30.5                               | 7.4 ± 2.5                | 1.1 ± 4.3           | 2.8 ± 1.1                          | 46.3 ± 24.5     | 0.43 ± 0.71                                 |
|        | Range   | 1.3 – 66.4                   | 5 – 74                   | 1 – 41                  | 200 – 2400    | 18 – 161                                  | 5 – 24                   | -0.65 – 10.1        | 0.5 – 6.0                          | 11 - 90         | 0 – 2.34                                    |
| Total  | N       | 8145                         | 776                      | 802                     | 802           | 803                                       | 800                      | 810                 | 804                                | 810             | 765                                         |
|        | Average | 5.0 ± 4.7                    | 23.1 ± 10.8              | 24.6 ± 12.5             | 673.7 ± 487.3 | 55.5 ± 26.4                               | 6.7 ± 4.3                | 13.8 ± 9.9          | 2.3 ± 1.1                          | 59.4 ± 22.1     | 0.59 ± 0.90                                 |
|        | Range   | 1.0 – 79.6                   | 4 – 74                   | 1 – 69                  | 200 – 3300    | 12 – 204                                  | 2 – 39                   | -6.5 – 34.1         | 0.1 – 6.4                          | 11 - 98         | 0 – 3.44                                    |

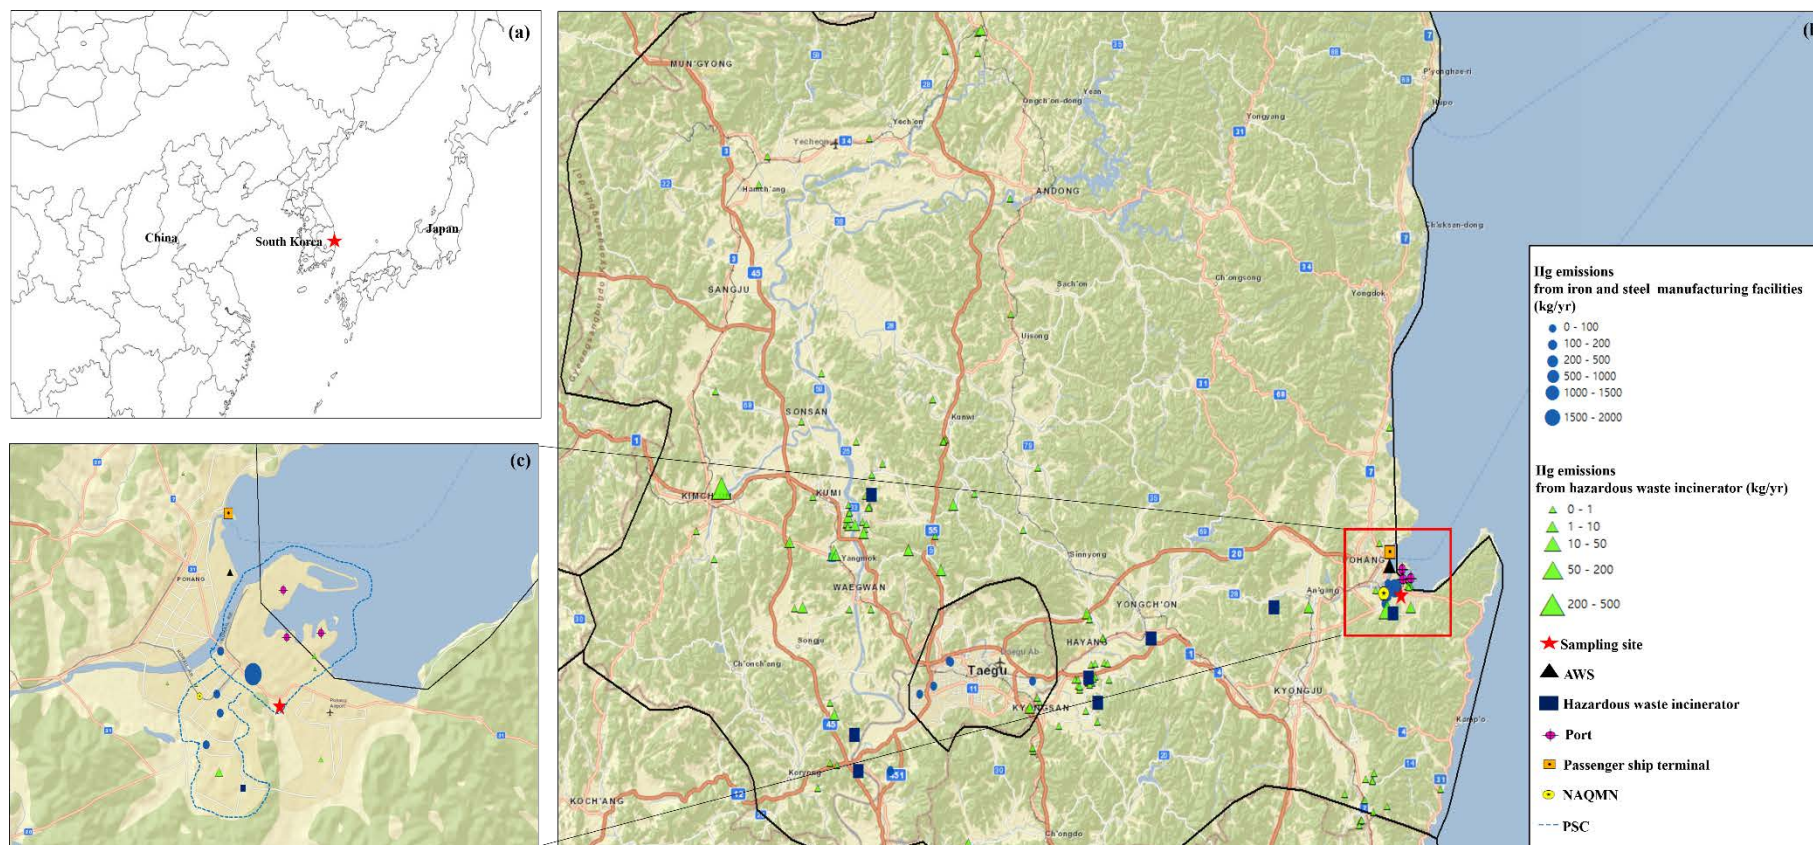

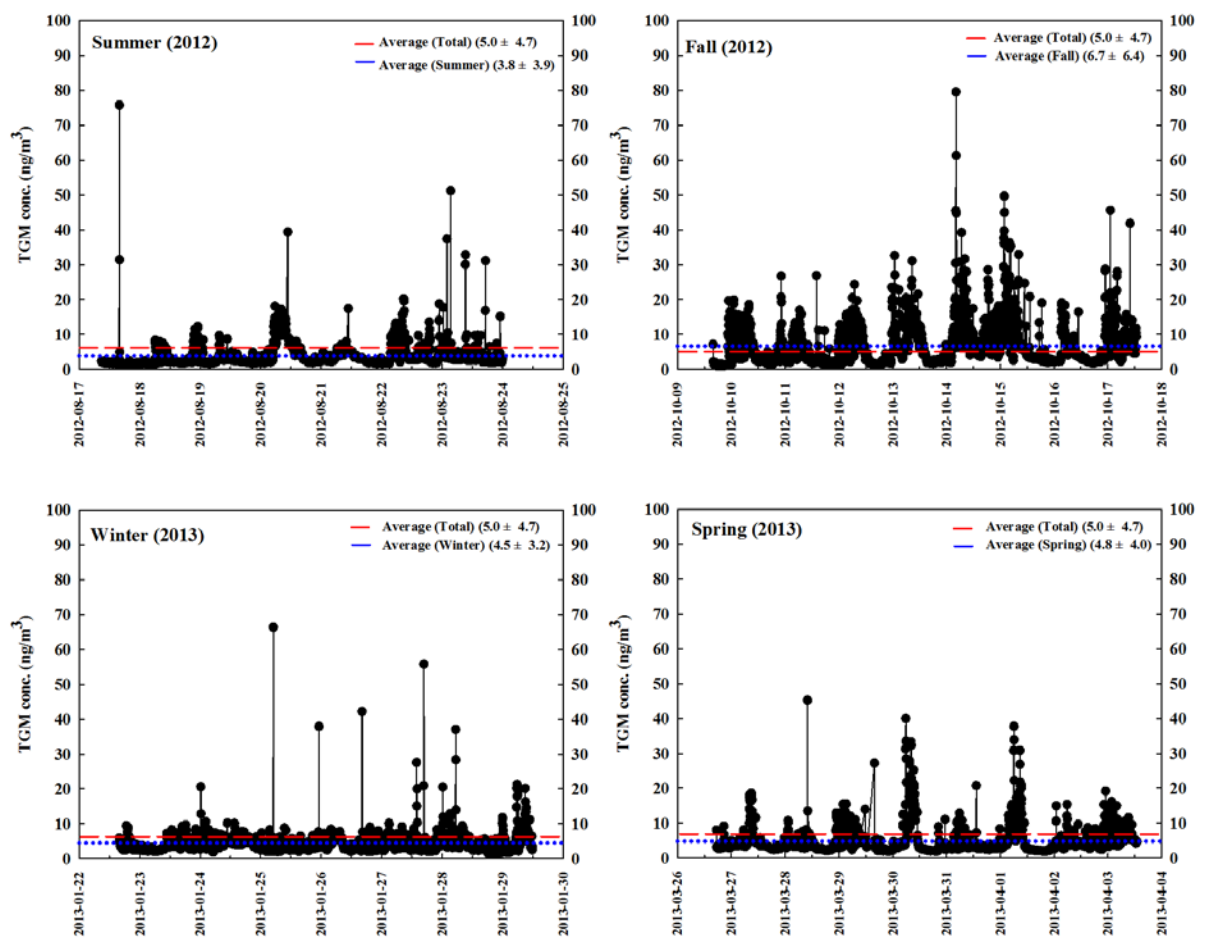

Fig. 2. Time-series of TGM concentrations in this study.

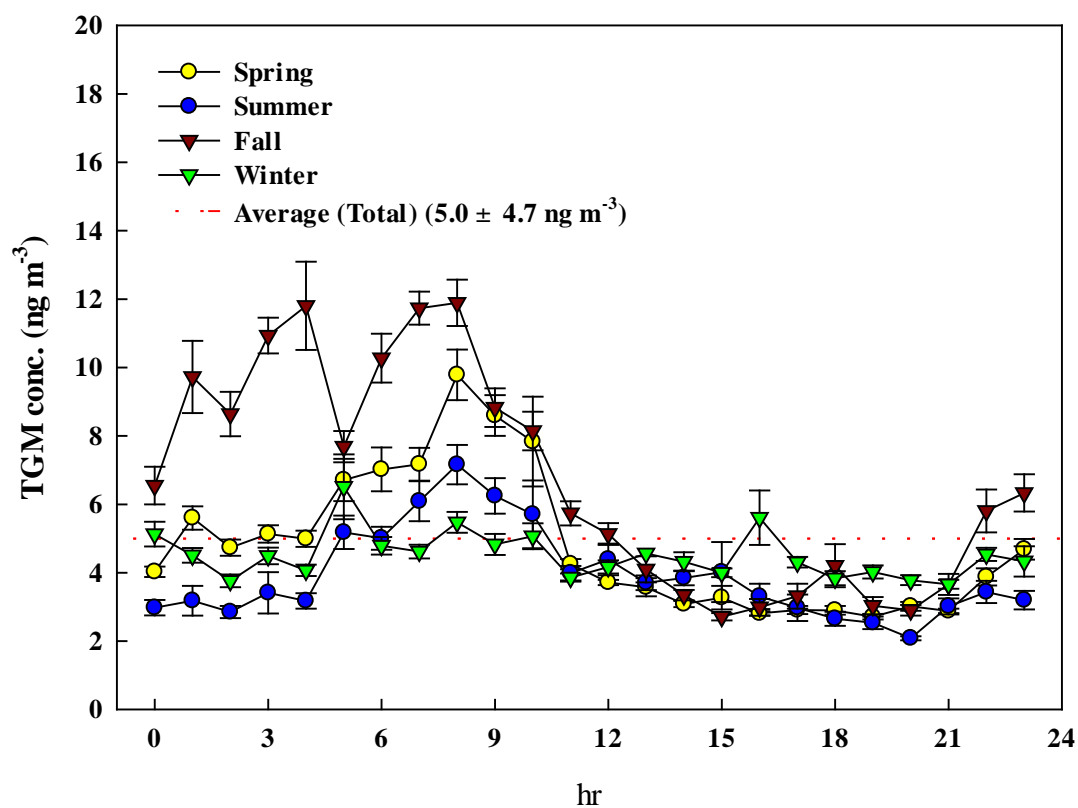

**Fig. 3.** The diurnal variations of TGM concentrations during the sampling periods. The error bars represent standard error.

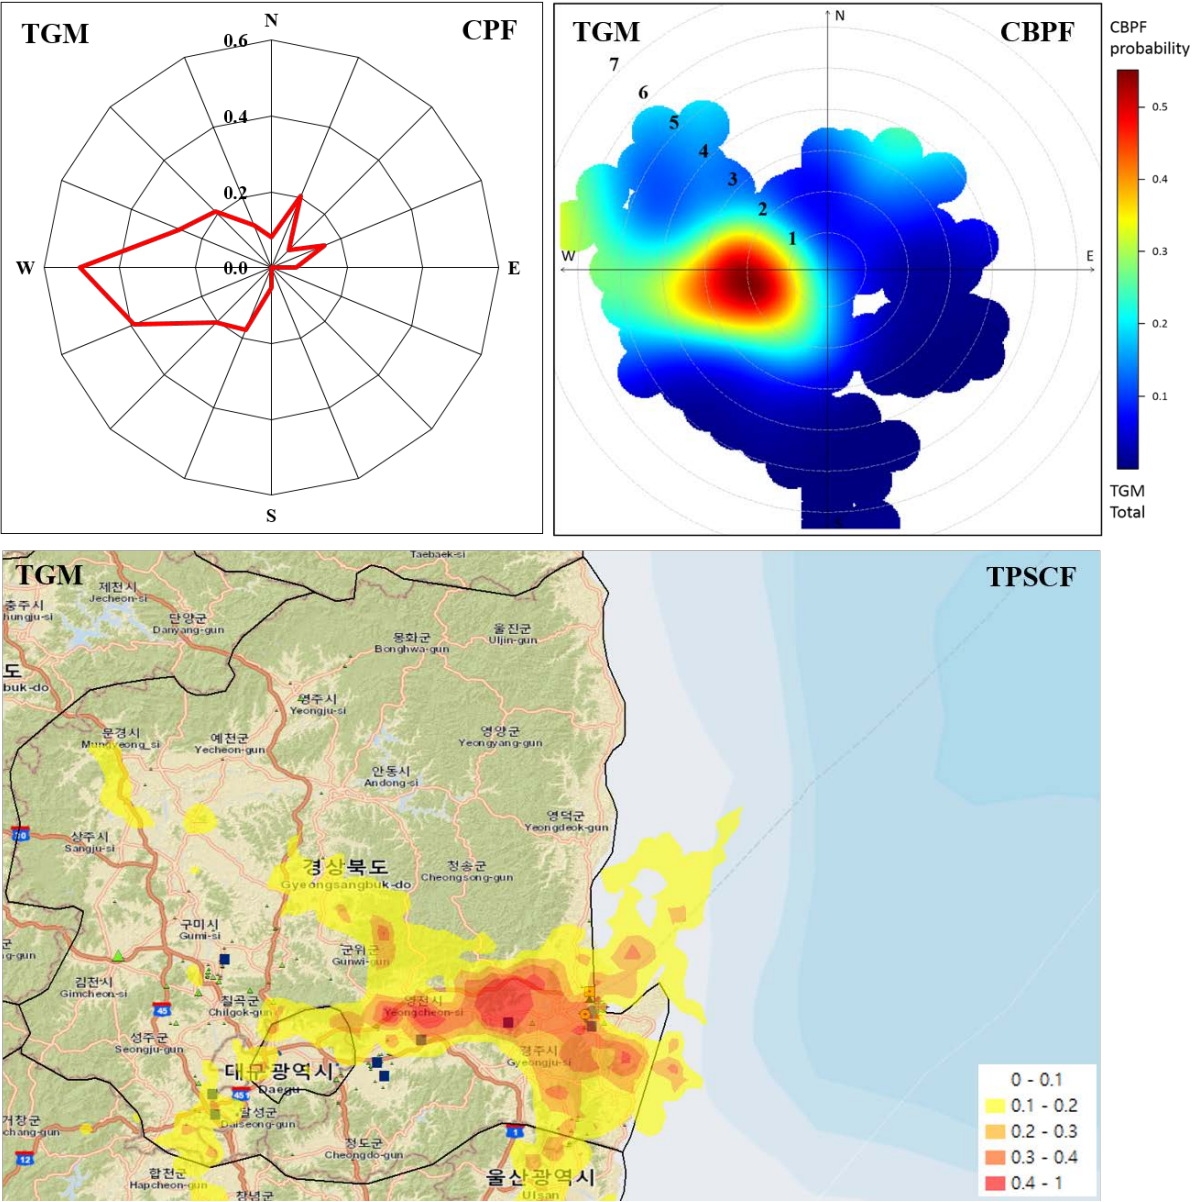

**Fig. 4.** CPF, CBPF and TPSCF plots for TGM higher than average concentration. The radial axes of CPF and CBPF are the probability and the wind speed ( $\text{m s}^{-1}$ ), respectively.



## References

- Adame, J., Notario, A., Villanueva, F., and Albaladejo, J.: Application of cluster analysis to surface ozone, NO<sub>2</sub> and SO<sub>2</sub> daily patterns in an industrial area in Central-Southern Spain measured with a DOAS system, *Sci. Total Environ.*, 429, 281-291, 2012.
- Amyot, M., Mcqueen, D. J., Mierle, G., and Lean, D. R.: Sunlight-induced formation of dissolved gaseous mercury in lake waters, *Environ. Sci. Technol.*, 28, 2366-2371, 1994.
- Ashbaugh, L. L., Malm, W. C., and Sadeh, W. Z.: A residence time probability analysis of sulfur concentrations at Grand Canyon National Park, *Atmospheric Environment* (1967), 19, 1263-1270, 1985.
- Begum, B. A., Kim, E., Biswas, S. K., and Hopke, P. K.: Investigation of sources of atmospheric aerosol at urban and semi-urban areas in Bangladesh, *Atmos. Environ.*, 38, 3025-3038, 2004.
- Chen, L., Liu, M., Xu, Z., Fan, R., Tao, J., Chen, D., Zhang, D., Xie, D., and Sun, J.: Variation trends and influencing factors of total gaseous mercury in the Pearl River Delta—A highly industrialised region in South China influenced by seasonal monsoons, *Atmos. Environ.*, 77, 757-766, 2013.
- Cheng, I., Zhang, L., Mao, H., Blanchard, P., Tordon, R., and Dalziel, J.: Seasonal and diurnal patterns of speciated atmospheric mercury at a coastal-rural and a coastal-urban site, *Atmos. Environ.*, 82, 193-205, 2014.
- Cheng, M. D., Hopke, P. K., and Zeng, Y.: A receptor-oriented methodology for determining source regions of particulate sulfate observed at Dorset, Ontario, *Journal of Geophysical Research: Atmospheres* (1984–2012), 98, 16839-16849, 1993.
- Choi, E.-M., Kim, S.-H., Holsen, T. M., and Yi, S.-M.: Total gaseous concentrations in mercury in Seoul, Korea: local sources compared to long-range transport from China and Japan, *Environ. Pollut.*, 157, 816-822, 2009.
- Choi, E., Heo, J.-B., Hopke, P. K., Jin, B.-B., and Yi, S.-M.: Identification, apportionment, and photochemical reactivity of non-methane hydrocarbon sources in Busan, Korea, *Water, Air, Soil Pollut.*, 215, 67-82, 2011.
- Choi, H.-D., Huang, J., Mondal, S., and Holsen, T. M.: Variation in concentrations of three mercury (Hg) forms at a rural and a suburban site in New York State, *Sci. Total Environ.*, 448, 96-106, 2013.
- Dommergue, A., Ferrari, C. P., Planchon, F. A., and Boutron, C. F.: Influence of anthropogenic sources on total gaseous mercury variability in Grenoble suburban air (France), *Sci. Total Environ.*, 297, 203-213, 2002.
- Dvonch, J., Graney, J., Marsik, F., Keeler, G., and Stevens, R.: An investigation of source–receptor relationships for mercury in south Florida using event precipitation data, *Sci. Total Environ.*, 213, 95-108, 1998.
- Fang, F., Wang, Q., and Li, J.: Urban environmental mercury in Changchun, a metropolitan city in Northeastern China: source, cycle, and fate, *Sci. Total Environ.*, 330, 159-170, 2004.
- Feng, X., Shang, L., Wang, S., Tang, S., and Zheng, W.: Temporal variation of total gaseous mercury in the air of Guiyang, China, *Journal of Geophysical Research: Atmospheres* (1984–2012), 109, 2004.
- Flanders, J., Turner, R., Morrison, T., Jensen, R., Pizzuto, J., Skalak, K., and Stahl, R.: Distribution, behavior, and transport of inorganic and methylmercury in a high gradient stream, *Appl. Geochem.*, 25, 1756-1769, 2010.

- Friedli, H., Arellano Jr, A., Geng, F., Cai, C., and Pan, L.: Measurements of atmospheric mercury in Shanghai during September 2009, *Atmos. Chem. Phys.*, 11, 3781-3788, 2011.
- Friedli, H. R., Radke, L. F., Prescott, R., Li, P., Woo, J. H., and Carmichael, G. R.: Mercury in the atmosphere around Japan, Korea, and China as observed during the 2001 ACE-Asia field campaign: Measurements, distributions, sources, and implications, *Journal of Geophysical Research: Atmospheres* (1984–2012), 109, 2004.
- Fu, X., Feng, X., Dong, Z., Yin, R., Wang, J., Yang, Z., and Zhang, H.: Atmospheric gaseous elemental mercury (GEM) concentrations and mercury depositions at a high-altitude mountain peak in south China, *Atmos. Chem. Phys.*, 10, 2425-2437, 2010.
- Fu, X., Feng, X., Zhu, W., Wang, S., and Lu, J.: Total gaseous mercury concentrations in ambient air in the eastern slope of Mt. Gongga, South-Eastern fringe of the Tibetan plateau, China, *Atmos. Environ.*, 42, 970-979, 2008.
- Fu, X., Zhang, H., Lin, C.-J., Feng, X., Zhou, L., and Fang, S.: Correlation slopes of GEM/CO, GEM/CO<sub>2</sub>, and GEM/CH<sub>4</sub> and estimated mercury emissions in China, South Asia, the Indochinese Peninsula, and Central Asia derived from observations in northwestern and southwestern China, *Atmospheric Chemistry and Physics*, 15, 1013-1028, 2015.
- Gabriel, M. C., Williamson, D. G., Brooks, S., and Lindberg, S.: Atmospheric speciation of mercury in two contrasting Southeastern US airsheds, *Atmos. Environ.*, 39, 4947-4958, 2005.
- Gauchard, P.-A., Ferrari, C. P., Dommergue, A., Poissant, L., Pilote, M., Guehenneux, G., Boutron, C. F., and Baussand, P.: Atmospheric particle evolution during a nighttime atmospheric mercury depletion event in sub-Arctic at Kuujuaupik/Whapmagoostui, Quebec, Canada, *Sci. Total Environ.*, 336, 215-224, 2005.
- Gupta, A., Patil, R., and Gupta, S.: Emissions of gaseous and particulate pollutants in a port and harbour region in India, *Environ. Monit. Assess.*, 80, 187-205, 2002.
- Hall, C. B., Mao, H., Ye, Z., Talbot, R., Ding, A., Zhang, Y., Zhu, J., Wang, T., Lin, C.-J., and Fu, C.: Sources and Dynamic Processes Controlling Background and Peak Concentrations of TGM in Nanjing, China, *Atmosphere*, 5, 124-155, 2014.
- Han, Y.-J., Holsen, T. M., Hopke, P. K., Cheong, J.-P., Kim, H., and Yi, S.-M.: Identification of source locations for atmospheric dry deposition of heavy metals during yellow-sand events in Seoul, Korea in 1998 using hybrid receptor models, *Atmos. Environ.*, 38, 5353-5361, 2004.
- Han, Y.-J., Holsen, T. M., Hopke, P. K., and Yi, S.-M.: Comparison between back-trajectory based modeling and Lagrangian backward dispersion modeling for locating sources of reactive gaseous mercury, *Environ. Sci. Technol.*, 39, 1715-1723, 2005.
- Han, Y.-J., Kim, J.-E., Kim, P.-R., Kim, W.-J., Yi, S.-M., Seo, Y.-S., and Kim, S.-H.: General trends of atmospheric mercury concentrations in urban and rural areas in Korea and characteristics of high-concentration events, *Atmos. Environ.*, 94, 754-764, 2014.
- Heo, J.-B., Hopke, P., and Yi, S.-M.: Source apportionment of PM<sub>2.5</sub> in Seoul, Korea, *Atmos. Chem. Phys.*, 9, 4957-4971, 2009.
- Holmes, C. D., Jacob, D. J., Mason, R. P., and Jaffe, D. A.: Sources and deposition of reactive gaseous mercury in the marine atmosphere, *Atmos. Environ.*, 43, 2278-2285, 2009.
- Hopke, P., Barrie, L., Li, S. M., Cheng, M. D., Li, C., and Xie, Y.: Possible sources and preferred pathways for biogenic and non-sea-salt sulfur for the high Arctic, *Journal of Geophysical Research: Atmospheres* (1984–2012), 100, 16595-16603, 1995.

- Hopke, P. K.: Recent developments in receptor modeling, *J. Chemometrics*, 17, 255-265, 2003.
- Hopke, P. K., Zhou, L., and Poirot, R. L.: Reconciling trajectory ensemble receptor model results with emissions, *Environ. Sci. Technol.*, 39, 7980-7983, 2005.
- Hoyer, M., Burke, J., and Keeler, G. 1995. Atmospheric sources, transport and deposition of mercury in Michigan: two years of event precipitation. *Mercury as a Global Pollutant*. Springer.
- Hsu, Y.-K., Holsen, T. M., and Hopke, P. K.: Comparison of hybrid receptor models to locate PCB sources in Chicago, *Atmos. Environ.*, 37, 545-562, 2003.
- Huang, J., Choi, H.-D., Hopke, P. K., and Holsen, T. M.: Ambient mercury sources in Rochester, NY: results from principle components analysis (PCA) of mercury monitoring network data, *Environ. Sci. Technol.*, 44, 8441-8445, 2010.
- Jaffe, D., Prestbo, E., Swartzendruber, P., Weiss-Penzias, P., Kato, S., Takami, A., Hatakeyama, S., and Kajii, Y.: Export of atmospheric mercury from Asia, *Atmos. Environ.*, 39, 3029-3038, 2005.
- Jen, Y.-H., Yuan, C.-S., Hung, C.-H., Ie, I.-R., and Tsai, C.-M.: Temporal variation and partition of atmospheric mercury during wet and dry seasons at sensitivity sites within a heavily polluted industrial city, *Aerosol Air Qual. Res.*, 13, 13-23, 2013.
- Keeler, G., and Barres, J.: Sampling and Analysis for Atmospheric Mercury, Center for Environmental Research Information, Cincinnati, 1999.
- Kellerhals, M., Beauchamp, S., Belzer, W., Blanchard, P., Froude, F., Harvey, B., McDonald, K., Pilote, M., Poissant, L., and Puckett, K.: Temporal and spatial variability of total gaseous mercury in Canada: results from the Canadian Atmospheric Mercury Measurement Network (CAMNet), *Atmos. Environ.*, 37, 1003-1011, 2003.
- Kim, E., Hopke, P. K., and Edgerton, E. S.: Source identification of Atlanta aerosol by positive matrix factorization, *J. Air Waste Manage. Assoc.*, 53, 731-739, 2003a.
- Kim, E., Larson, T. V., Hopke, P. K., Slaughter, C., Sheppard, L. E., and Claiborn, C.: Source identification of PM<sub>2.5</sub> in an arid Northwest US City by positive matrix factorization, *Atmospheric Research*, 66, 291-305, 2003b.
- Kim, J.-H., Park, J.-M., Lee, S.-B., Pudasainee, D., and Seo, Y.-C.: Anthropogenic mercury emission inventory with emission factors and total emission in Korea, *Atmos. Environ.*, 44, 2714-2721, 2010.
- Kim, K.-H., Brown, R. J., Kwon, E., Kim, I.-S., and Sohn, J.-R.: Atmospheric mercury at an urban station in Korea across three decades, *Atmos. Environ.*, 131, 124-132, 2016.
- Kim, K.-H., and Kim, M.-Y.: Some insights into short-term variability of total gaseous mercury in urban air, *Atmos. Environ.*, 35, 49-59, 2001.
- Kim, S.-H., Han, Y.-J., Holsen, T. M., and Yi, S.-M.: Characteristics of atmospheric speciated mercury concentrations (TGM, Hg (II) and Hg (p)) in Seoul, Korea, *Atmos. Environ.*, 43, 3267-3274, 2009.
- Kuo, T.-H., Chang, C.-F., Urban, A., and Kvietkus, K.: Atmospheric gaseous mercury in Northern Taiwan, *Sci. Total Environ.*, 368, 10-18, 2006.
- Lai, S.-O., Holsen, T. M., Hopke, P. K., and Liu, P.: Wet deposition of mercury at a New York state rural site: concentrations, fluxes, and source areas, *Atmos. Environ.*, 41, 4337-4348, 2007.
- Laurier, F. J., Mason, R. P., Whalin, L., and Kato, S.: Reactive gaseous mercury formation in the North Pacific Ocean's marine boundary layer: A potential role of halogen chemistry, *Journal of Geophysical Research: Atmospheres* (1984–2012), 108, 2003.
- Lee, D. S., Dollard, G. J., and Pepler, S.: Gas-phase mercury in the atmosphere of the United Kingdom, *Atmos. Environ.*, 32, 855-864, 1998.



- 693 Lee, S. J., Seo, Y.-C., Jurng, J., Hong, J.-H., Park, J.-W., Hyun, J. E., and Lee, T. G.:  
 694 Mercury emissions from selected stationary combustion sources in Korea, *Sci. Total*  
 695 *Environ.*, 325, 155-161, 2004.
- 696 Li, Z., Xia, C., Wang, X., Xiang, Y., and Xie, Z.: Total gaseous mercury in Pearl River Delta  
 697 region, China during 2008 winter period, *Atmos. Environ.*, 45, 834-838, 2011.
- 698 Lim, C.-J., Cheng, M.-D., and Schroeder, W. H.: Transport patterns and potential sources of  
 699 total gaseous mercury measured in Canadian high Arctic in 1995, *Atmos. Environ.*,  
 700 35, 1141-1154, 2001.
- 701 Lin, C.-J., and Pehkonen, S. O.: The chemistry of atmospheric mercury: a review, *Atmos.*  
 702 *Environ.*, 33, 2067-2079, 1999.
- 703 Lin, C.-J., Pongprueksa, P., Lindberg, S. E., Pehkonen, S. O., Byun, D., and Jang, C.:  
 704 Scientific uncertainties in atmospheric mercury models I: Model science evaluation,  
 705 *Atmos. Environ.*, 40, 2911-2928, 2006.
- 706 Lindberg, S., Bullock, R., Ebinghaus, R., Engstrom, D., Feng, X., Fitzgerald, W., Pirrone, N.,  
 707 Prestbo, E., and Seigneur, C.: A synthesis of progress and uncertainties in attributing  
 708 the sources of mercury in deposition, *AMBIO: A Journal of the Human Environment*,  
 709 36, 19-33, 2007.
- 710 Liu, N., Qiu, G., Landis, M. S., Feng, X., Fu, X., and Shang, L.: Atmospheric mercury  
 711 species measured in Guiyang, Guizhou province, southwest China, *Atmospheric*  
 712 *Research*, 100, 93-102, 2011.
- 713 Lu, J. Y., and Schroeder, W. H.: Annual time-series of total filterable atmospheric mercury  
 714 concentrations in the Arctic, *Tellus B*, 56, 213-222, 2004.
- 715 Lynam, M. M., and Keeler, G. J.: Source-receptor relationships for atmospheric mercury in  
 716 urban Detroit, Michigan, *Atmos. Environ.*, 40, 3144-3155, 2006.
- 717 Mao, H., Talbot, R., Sigler, J., Sive, B., and Hegarty, J.: Seasonal and diurnal variations of  
 718 Hg over New England, *Atmospheric Chemistry and Physics*, 8, 1403-1421, 2008.
- 719 Marumoto, K., Hayashi, M., and Takami, A.: Atmospheric mercury concentrations at two  
 720 sites in the Kyushu Islands, Japan, and evidence of long-range transport from East  
 721 Asia, *Atmos. Environ.*, 117, 147-155, 2015.
- 722 Mason, R. P., and Sheu, G. R.: Role of the ocean in the global mercury cycle, *Global*  
 723 *biogeochemical cycles*, 16, 40-1-40-14, 2002.
- 724 Miller, C. L., Watson, D. B., Lester, B. P., Lowe, K. A., Pierce, E. M., and Liang, L.:  
 725 Characterization of soils from an industrial complex contaminated with elemental  
 726 mercury, *Environ. Res.*, 125, 20-29, 2013.
- 727 Nakagawa, R.: Studies on the levels in atmospheric concentrations of mercury in Japan,  
 728 *Chemosphere*, 31, 2669-2676, 1995.
- 729 Nier: National Air Pollutants Emission 2011 (in Korean), 2011.
- 730 Obrist, D., Tas, E., Peleg, M., Matveev, V., Fain, X., Asaf, D., and Luria, M.: Bromine-  
 731 induced oxidation of mercury in the mid-latitude atmosphere, *Nature Geoscience*, 4,  
 732 22-26, 2011.
- 733 Osawa, T., Ueno, T., and Fu, F.: Sequential variation of atmospheric mercury in Tokai-mura,  
 734 seaside area of eastern central Japan, *Journal of Geophysical Research: Atmospheres*  
 735 (1984–2012), 112, 2007.
- 736 Pacyna, E. G., Pacyna, J. M., Steenhuisen, F., and Wilson, S.: Global anthropogenic mercury  
 737 emission inventory for 2000, *Atmos. Environ.*, 40, 4048-4063, 2006.
- 738 Pirrone, N., Cinnirella, S., Feng, X., Finkelman, R., Friedli, H., Leaner, J., Mason, R.,  
 739 Mukherjee, A., Stracher, G., and Streets, D.: Global mercury emissions to the  
 740 atmosphere from anthropogenic and natural sources, *Atmospheric Chemistry and*  
 741 *Physics*, 10, 5951-5964, 2010.

- Poissant, L.: Potential sources of atmospheric total gaseous mercury in the St. Lawrence River valley, *Atmos. Environ.*, 33, 2537-2547, 1999.
- Polissar, A. V., Hopke, P. K., and Harris, J. M.: Source regions for atmospheric aerosol measured at Barrow, Alaska, *Environ. Sci. Technol.*, 35, 4214-4226, 2001.
- Sakata, M., and Marumoto, K.: Formation of atmospheric particulate mercury in the Tokyo metropolitan area, *Atmos. Environ.*, 36, 239-246, 2002.
- Sakata, M., and Marumoto, K.: Wet and dry deposition fluxes of mercury in Japan, *Atmos. Environ.*, 39, 3139-3146, 2005.
- Schmeltz, D., Evers, D. C., Driscoll, C. T., Artz, R., Cohen, M., Gay, D., Haeuber, R., Krabbenhoft, D. P., Mason, R., and Morris, K.: MercNet: a national monitoring network to assess responses to changing mercury emissions in the United States, *Ecotoxicology*, 20, 1713-1725, 2011.
- Schmolke, S. R., Schroeder, W., Kock, H., Schneeberger, D., Munthe, J., and Ebinghaus, R.: Simultaneous measurements of total gaseous mercury at four sites on a 800km transect: spatial distribution and short-time variability of total gaseous mercury over central Europe, *Atmos. Environ.*, 33, 1725-1733, 1999.
- Schroeder, W. H., and Munthe, J.: Atmospheric mercury—an overview, *Atmos. Environ.*, 32, 809-822, 1998.
- Seo, Y.-S., Han, Y.-J., Holsen, T. M., Choi, E., Zoh, K.-D., and Yi, S.-M.: Source identification of total mercury (TM) wet deposition using a Lagrangian particle dispersion model (LPDM), *Atmos. Environ.*, 104, 102-111, 2015.
- Shon, Z.-H., Kim, K.-H., Kim, M.-Y., and Lee, M.: Modeling study of reactive gaseous mercury in the urban air, *Atmos. Environ.*, 39, 749-761, 2005.
- Song, X., Cheng, I., and Lu, J.: Annual atmospheric mercury species in downtown Toronto, Canada, *J. Environ. Monit.*, 11, 660-669, 2009.
- Sprovieri, F., Pirrone, N., Ebinghaus, R., Kock, H., and Dommergue, A.: A review of worldwide atmospheric mercury measurements, *Atmospheric Chemistry and Physics*, 10, 8245-8265, 2010.
- Stamenkovic, J., Lyman, S., and Gustin, M. S.: Seasonal and diel variation of atmospheric mercury concentrations in the Reno (Nevada, USA) airshed, *Atmos. Environ.*, 41, 6662-6672, 2007.
- Uria-Tellaetxe, I., and Carslaw, D. C.: Conditional bivariate probability function for source identification, *Environ. Model. Software*, 59, 1-9, 2014.
- Wan, Q., Feng, X., Lu, J., Zheng, W., Song, X., Han, S., and Xu, H.: Atmospheric mercury in Changbai Mountain area, northeastern China I. The seasonal distribution pattern of total gaseous mercury and its potential sources, *Environ. Res.*, 109, 201-206, 2009.
- Weiss-Penzias, P., Jaffe, D., Swartzendruber, P., Hafner, W., Chand, D., and Prestbo, E.: Quantifying Asian and biomass burning sources of mercury using the Hg/CO ratio in pollution plumes observed at the Mount Bachelor Observatory, *Atmos. Environ.*, 41, 4366-4379, 2007.
- Weiss-Penzias, P., Jaffe, D. A., Mcclintick, A., Prestbo, E. M., and Landis, M. S.: Gaseous elemental mercury in the marine boundary layer: Evidence for rapid removal in anthropogenic pollution, *Environ. Sci. Technol.*, 37, 3755-3763, 2003.
- Weiss-Penzias, P., Jaffe, D. A., Swartzendruber, P., Dennison, J. B., Chand, D., Hafner, W., and Prestbo, E.: Observations of Asian air pollution in the free troposphere at Mount Bachelor Observatory during the spring of 2004, *Journal of Geophysical Research: Atmospheres* (1984–2012), 111, 2006.

- 789 Xie, Y., and Berkowitz, C. M.: The use of positive matrix factorization with conditional  
790 probability functions in air quality studies: an application to hydrocarbon emissions in  
791 Houston, Texas, *Atmos. Environ.*, 40, 3070-3091, 2006.
- 792 Zeng, Y., and Hopke, P.: A study of the sources of acid precipitation in Ontario, Canada,  
793 *Atmospheric Environment* (1967), 23, 1499-1509, 1989.
- 794 Zhang, H., and Lindberg, S. E.: Sunlight and iron (III)-induced photochemical production of  
795 dissolved gaseous mercury in freshwater, *Environ. Sci. Technol.*, 35, 928-935, 2001.
- 796 Zhao, W., Hopke, P. K., and Karl, T.: Source identification of volatile organic compounds in  
797 Houston, Texas, *Environ. Sci. Technol.*, 38, 1338-1347, 2004.
- 798 Zhou, L., Kim, E., Hopke, P. K., Stanier, C. O., and Pandis, S.: Advanced factor analysis on  
799 Pittsburgh particle size-distribution data special issue of aerosol science and  
800 technology on findings from the Fine Particulate Matter Supersites Program, *Aerosol*  
801 *Science and Technology*, 38, 118-132, 2004.
- 802 Zhu, J., Wang, T., Talbot, R., Mao, H., Hall, C., Yang, X., Fu, C., Zhuang, B., Li, S., and  
803 Han, Y.: Characteristics of atmospheric total gaseous mercury (TGM) observed in  
804 urban Nanjing, China, *Atmospheric Chemistry and Physics*, 12, 12103-12118, 2012.
